# Supplementary material for: Results of physician licence examination and scholarship contract compliance by the graduates of regional quotas in Japanese medical schools: a nationwide cross-sectional survey
Source: PubMed Central journal article supplement — BMJ Open. 2017 Dec 22;7(12):e019418. doi: 10.1136/bmjopen-2017-019418 (PMC5770952; doi:10.1136/bmjopen-2017-019418), 2017-12-22
Supplement: bmjopen-2017-019418.draft_revisions.pdf [file bmjopen-2017-019418.draft_revisions.pdf]

# BMJ Open

BMJ Open is committed to open peer review. As part of this commitment we make the peer review history of every article we publish publicly available.

When an article is published we post the peer reviewers' comments and the authors' responses online. We also post the versions of the paper that were used during peer review. These are the versions that the peer review comments apply to.

The versions of the paper that follow are the versions that were submitted during the peer review process. They are not the versions of record or the final published versions. They should not be cited or distributed as the published version of this manuscript.

BMJ Open is an open access journal and the full, final, typeset and author-corrected version of record of the manuscript is available on our site with no access controls, subscription charges or pay-per-view fees (<http://bmjopen.bmj.com>).

If you have any questions on BMJ Open's open peer review process please email [editorial.bmjopen@bmj.com](mailto:editorial.bmjopen@bmj.com)

# BMJ Open

## Results of physician license examination and scholarship contract compliance by the graduates of regional subquotas in Japanese medical schools

|                                 |                                                                                                                                                                                                                                                                                                                                                                                                                                                                                                                                                                                                                                                                                                             |
|---------------------------------|-------------------------------------------------------------------------------------------------------------------------------------------------------------------------------------------------------------------------------------------------------------------------------------------------------------------------------------------------------------------------------------------------------------------------------------------------------------------------------------------------------------------------------------------------------------------------------------------------------------------------------------------------------------------------------------------------------------|
| Journal:                        | <i>BMJ Open</i>                                                                                                                                                                                                                                                                                                                                                                                                                                                                                                                                                                                                                                                                                             |
| Manuscript ID                   | bmjopen-2017-019418                                                                                                                                                                                                                                                                                                                                                                                                                                                                                                                                                                                                                                                                                         |
| Article Type:                   | Research                                                                                                                                                                                                                                                                                                                                                                                                                                                                                                                                                                                                                                                                                                    |
| Date Submitted by the Author:   | 31-Aug-2017                                                                                                                                                                                                                                                                                                                                                                                                                                                                                                                                                                                                                                                                                                 |
| Complete List of Authors:       | Matsumoto, Masatoshi; Hiroshima Daigaku, Community-based Medical System<br>Takeuchi, keisuke<br>Owaki, Tetsuhiro; Graduate School of Medical Sciences, Kagoshima University, Education Center for Doctors in Remote Islands and Rural Areas<br>Iguchi, Seitaro; Niigata University Graduate School of Medical & Dental Sciences, Department of Community Medicine<br>Inoue, Kazuo; Chiba Medical Center, Teikyo University School of Medicine, Department of Community Medicine<br>Kashima, Saori; Hiroshima Daigaku, Public Health and Health Policy<br>Tazuma, Susumu; Hiroshima University Hospital, General Internal Medicine<br>Maeda, Takahiro; Nagasaki University, Department of Community Medicine |
| <b>Primary Subject Heading</b>: | Health policy                                                                                                                                                                                                                                                                                                                                                                                                                                                                                                                                                                                                                                                                                               |
| Secondary Subject Heading:      | Health policy, Medical education and training                                                                                                                                                                                                                                                                                                                                                                                                                                                                                                                                                                                                                                                               |
| Keywords:                       | physician, geography, MEDICAL EDUCATION & TRAINING, Health policy < HEALTH SERVICES ADMINISTRATION & MANAGEMENT, Japan                                                                                                                                                                                                                                                                                                                                                                                                                                                                                                                                                                                      |
|                                 |                                                                                                                                                                                                                                                                                                                                                                                                                                                                                                                                                                                                                                                                                                             |

SCHOLARONE™  
Manuscripts

Results of physician license examination and scholarship contract compliance by the graduates of regional subquotas in Japanese medical schools

Masatoshi Matsumoto<sup>1</sup>, Keisuke Takeuchi<sup>1</sup>, Tetsuhiro Owaki<sup>2</sup>, Seitaro Iguchi<sup>3</sup>, Kazuo Inoue<sup>4</sup>, Saori Kashima<sup>5</sup>, Susumu Tazuma<sup>6</sup>, Takahiro Maeda<sup>7</sup>

1. Department of Community-Based Medical System, Institute of Biomedical and Health Sciences, Hiroshima University, Hiroshima, Japan

2. Education Center for Doctors in Remote Islands and Rural Areas, Graduate School of Medical Sciences, Kagoshima University, Kagoshima, Japan

3. Department of Community Medicine, Niigata University Graduate School of Medical & Dental Sciences, Niigata, Japan

4. Department of Community Medicine, Chiba Medical Center, Teikyo University School of Medicine, Chiba, Japan

5. Department of Public Health and Health Policy, Graduate School of Biomedical and Health Sciences, Hiroshima University, Hiroshima, Japan

6. Department of General Internal Medicine, Hiroshima University Hospital and Graduate School of Biomedical & Health Sciences, Hiroshima, Japan

7. Department of Community Medicine, Nagasaki University Graduate School of Biomedical Science, Nagasaki, Japan

Corresponding author: Masatoshi Matsumoto

Department of Community Based Medical System, Institute of Biomedical and Health Sciences, Hiroshima University

1-2-3 Kasumi, Minami-ku, Hiroshima, 734-8551 JAPAN

Phone: +81-82-257-5894 Fax: +81-82 257-5895 Email: matmo10@jb3.so-net.ne.jp

Keywords: physicians; geography; medical education; health policy; Japan

Word count: 2732

## ABSTRACT

### Objectives:

Responding to the serious shortage of physicians in rural areas, the Japanese government has aggressively increased the number of entrants to medical schools since 2008, mostly as a *chiikiwaku*, a regional subquota. The subquota has spread to most medical schools, and these entrants occupied 16% of all medical school seats in 2016. Most of these entrants were admitted to medical school with a scholarship with the understanding that after graduation they will practice in designated areas of their home prefectures for several years. The subquota and scholarship systems will be revised by the government starting in 2018. This study evaluates the intermediate outcomes of the subquota system and prefecture scholarship programmes.

**Design:** Cross-sectional survey to all prefectural governments and medical schools every year from 2014 to 2017

**Settings:** Nationwide

**Participants:** All subquota and non-subquota graduates with prefecture scholarship in each prefecture, and all the subquota graduates without scholarship in each medical school.

**Primary outcome measures:** Passing rate of the National License Examination for Physicians, and the percentage of graduates who have not bought out the scholarship contract after graduation.

**Results:** Almost all of Japan's prefectures and medical schools participated in this study

1  
2  
3  
4  
5  
6 (97.8-100%). Subquota graduates with scholarship were significantly more likely to pass the  
7  
8 National License Examination for Physicians than all medical graduates in all the years (97.9, 96.7,  
9  
10 97.4 and 94.7% versus 93.9, 94.5, 94.3 and 91.8%, respectively). The percentage of subquota  
11  
12 graduates with scholarship who remained in the scholarship contract 3.25 years after graduation was  
13  
14 92.2% , and 89.9% for non-subquota graduates with scholarship.  
15  
16  
17  
18  
19

20 **Conclusions:** Subquota entrants showed better academic performance than their peers. Most of the  
21  
22 subquota graduates remained in the contractual workforce. The imminent revision of the national  
23  
24 policies regarding subquota and scholarship systems need to be based on this evidence.  
25  
26  
27  
28  
29  
30  
31  
32  
33  
34  
35  
36  
37  
38  
39  
40  
41  
42  
43  
44  
45  
46  
47  
48  
49  
50  
51  
52  
53  
54  
55  
56  
57  
58  
59  
60

### Strengths and limitations of this study

- This study shows intermediate outcomes of subquota admission system of medical schools and prefecture scholarship programmes, one of the largest national policies enacted to improve Japan's geographic maldistribution of physicians.
- With support from concerned ministries and the representative body of medical schools, almost all of Japan's prefectural governments and medical schools participated in this study, which enabled the collection of reliable information on study subjects every year.
- The passing rates of the National License Examination for Physicians of the subquota graduates with scholarship, subquota graduates without scholarship, and non-subquota graduates with scholarship were compared to that of all medical graduates in Japan.
- The percentages of subquota and non-subquota graduates with scholarship who have not bought out the scholarship contract were calculated and compared.
- Geographic location of the subquota graduates and scholarship recipients are unknown, and will be shown based on the data from the ongoing nationwide cohort study, a part of which is this study.

## INTRODUCTION

### Geographic distribution of physicians in Japan

1  
2  
3  
4  
5  
6 The geographic inequity of physician distribution has long been a social problem in Japan and in  
7  
8 many other countries. Japan's national and local governments have attempted to solve this problem  
9  
10 by establishing public hospitals and clinics in rural areas since 1950s, creating at least one medical  
11  
12 school in each prefecture in 1960s and 1970s, including Jichi Medical University in 1972 which is  
13  
14 exclusively responsible for producing rural physicians.<sup>1,2</sup>  
15  
16  
17  
18  
19

20 Over the long term, these policies have increased the number of physicians in rural areas,<sup>3</sup> but  
21  
22 many studies revealed that the disparity in the number of urban and rural physicians has been  
23  
24 persisting.<sup>3-8</sup> This maldistribution of physicians has worsened since 2004 when the new residency  
25  
26 training system for the physicians within the first two years after graduation was introduced  
27  
28 nationwide.<sup>4,8</sup> Furthermore, the new specialty training system for physicians after the residency  
29  
30 training is schedule to start in 2018, which has caused a great concern among health professionals  
31  
32 and policy makers that young physicians will be even more likely to cluster in large cities.<sup>9-12</sup>  
33  
34  
35  
36  
37  
38  
39  
40  
41

#### 42 ***Chiikiwaku* (regional subquota) and prefecture scholarship as a national policy**

43  
44

45 In response to such a situation, the national government has aggressively increased the number  
46  
47 of entrants to medical schools since 2008. Most of these entrants were admitted as a *chiikiwaku*, a  
48  
49 regional subquota of a medical school. The subquota has spread to most of the medical schools in  
50  
51 Japan. The subquota is a special admission quota of a medical school in which entrants were  
52  
53  
54  
55  
56  
57  
58  
59  
60

1  
2  
3  
4  
5  
6 admitted under the condition that they practice in designated areas of their home prefectures,  
7  
8 usually in rural areas in exchange for a scholarship by the prefectural government.<sup>13</sup> The  
9  
10 scholarship is given for the all six years of undergraduate medical education, and the graduate is  
11  
12 required to work in the prefecture for nine years after graduation including four years in rural areas  
13  
14 of the prefecture. Some medical schools have a regional subquota without the scholarship. Entrants  
15  
16 under this form of subquota thus are not contractually required to work in designated areas though  
17  
18 they are expected to do so.<sup>14</sup> The number of entrants to any form of regional subquota is now 1504,  
19  
20 accounting for 16% of all medical school students in Japan.<sup>15,16</sup> The model of these subquotas was  
21  
22 Jichi Medical University.  
23  
24  
25  
26  
27  
28  
29  
30

31 Apart from the scholarship given in couple with the subquota admission, there are scholarship  
32  
33 programmes of prefectural governments for non-*chiikiwaku* students. These scholarships are also  
34  
35 based in national policy. The scholarship is given to a medical student who has been admitted to a  
36  
37 medical school and then applies to the scholarship programme. The recipients of these scholarships  
38  
39 are also required to work in the designated areas of the prefecture for a certain amount of time,  
40  
41 usually 1.5 times the length of the term of the scholarship. Half of that contractual period is to be  
42  
43 spent practicing in rural areas of the prefecture.<sup>14</sup>  
44  
45  
46  
47  
48  
49  
50  
51  
52  
53

#### 54 **Academic performance and compliance of scholarship contract**

55  
56  
57  
58  
59  
60



1  
2  
3  
4  
5  
6 Admission to medical schools in Japan is highly competitive. In 2016, one in four applicants of  
7  
8 public medical schools and one in 16 applicants of private medical schools were accepted.<sup>17,18</sup>  
9  
10  
11 Medical schools have not traditionally imposed restrictions on the geographic background of  
12  
13  
14 applicants, so each medical school, even rural ones, attracts applicants from all over Japan. Most the  
15  
16  
17 medical schools require several days of tests and an interview of all the applicants, so given the lack  
18  
19  
20 of time for interviews, admission decisions are largely based on scores of written test.  
21

22  
23 Entrance examination for regional subquota is different. Most medical schools admit students  
24  
25 only from the prefecture in which they live and/or where the scholarship is given. In addition, many  
26  
27  
28 medical schools consider only applicants who have been recommended by their high schools. Thus  
29  
30  
31 there are far fewer applicants to the subquotas. The application process for subquota applicants is  
32  
33  
34 usually a combination of written test, academic records in the high school, a personal statement, and  
35  
36  
37 an interview. The academic test thus carries less weight as compared with the conventional  
38  
39  
40 admission process. Because of these differences, the academic performance of subquota entrants  
41  
42  
43 have been concerned about among general population and medical educators since the start of this  
44  
45  
46 special admission system.<sup>14</sup> However, so far, no researchers seem to have compared the academic  
47  
48  
49 outcomes of subquota and non-subquota students.  
50

51  
52 There has also been a concern that many subquota entrants may buy out the scholarship contract  
53  
54  
55 to avoid practicing in the prefecture and/or in rural areas. However, no researchers have investigated  
56  
57  
58  
59  
60

1  
2  
3  
4  
5  
6 how many subquota entrants have actually done this.  
7  
8  
9

## 10 11 **Objectives of this study** 12

13  
14 In this study we compared the results of the National License Examination for Physicians among  
15 graduates of subquota with scholarship, subquota without scholarship, non-subquota with  
16 scholarship and all new medical graduates in Japan. We also showed the percentages of those  
17 graduates who have not bought out the scholarship and thus completed their contractual work. We  
18 assessed the intermediate outcomes of subquota and scholarship systems, and attempted to offer  
19 scientific evidence to inform political decision makers for future revision of the subquota and  
20 scholarship systems.  
21  
22  
23  
24  
25  
26  
27  
28  
29  
30  
31  
32  
33  
34  
35  
36

## 37 **METHODS** 38

39 The method of this study has already been reported,<sup>14</sup> thus is described briefly.  
40  
41  
42  
43  
44

### 45 **Design and settings** 46

47  
48 This study is a part of the nationwide cohort study conducted by the Japanese Council for  
49 Community-based Medical Education (JCCME). Yearly cross-sectional outcomes of the cohort study  
50 are reported in this study. The study period is from 2014 to 2017. The study include the following  
51  
52  
53  
54  
55  
56  
57  
58  
59  
60

1  
2  
3  
4  
5  
6 three groups of subjects: subquota graduates with scholarship, non-subquota graduates with  
7  
8 scholarship (scholarship alone), and subquota graduates without scholarship. Data of the former two  
9  
10  
11 groups were collected from prefectures and that of the last group were from medical schools (Figure  
12  
13  
14 1).

15  
16  
17  
18  
19  
20 Figure 1 here  
21  
22  
23  
24

25  
26 Every November, the cohort study office of JCCME sent a pre-survey questionnaire to all the 47  
27  
28 prefectures and all the 77 medical schools except for Jichi Medical University, National Defence  
29  
30 Medical College, and University of Occupational and Environmental Health to know which  
31  
32 prefectures and medical schools have eligible subjects. Every year all the prefectures and medical  
33  
34 schools responded to this. In June of the survey year, the study office sends a survey questionnaire to  
35  
36 each prefectural government to obtain information on the number of new graduates who had  
37  
38 received scholarship, the number who passed the National License Examination for Physicians, and  
39  
40 the number who have bought out the scholarship. The cohort office sends a questionnaire to each  
41  
42 medical school to obtain information on the number of subquota students without scholarship and  
43  
44 number who passed the National License Examination for Physicians. The Ministry of Health,  
45  
46 Labour and Welfare, the Ministry of Education Culture, Sports, Science and Technology, and the  
47  
48  
49  
50  
51  
52  
53  
54  
55  
56  
57  
58  
59  
60

1  
2  
3  
4  
5  
6 Association of Japan Medical Colleges supported this study by requesting prefectures and/or medical  
7  
8 schools to participate.  
9

### 10 11 12 13 14 **Definitions of subquota and scholarship** 15

16  
17 In this study, a subquota of medical school is one whose “geographic background or location of  
18  
19 graduated high schools of applicants are restricted and/or working place or specialty after graduation  
20  
21 is clearly specified.” A scholarship is “given by a prefecture to a medical student which needs not to  
22  
23 be paid back if the student works in designated areas by the prefecture for a certain period.”  
24  
25  
26  
27  
28  
29  
30

### 31 **Statistical analyses** 32

33  
34 Based on the data obtained from the prefectures and medical schools, passing rates of the  
35  
36 National License Examination for Physicians were calculated for the subjects in subquota with  
37  
38 scholarship, subquota without scholarship, and non-subquota with scholarship (scholarship alone).  
39  
40 The rates in 2014 and 2015 have been reported previously,<sup>14</sup> and in this study, results in 2015 and  
41  
42 2016 were added. These rates were compared with the passing rate of all medical school graduates in  
43  
44 Japan reported every year by the Ministry of Health, Labour and Welfare.<sup>19,20</sup> The comparisons were  
45  
46 conducted with the Fisher’s exact test.  
47  
48  
49  
50  
51  
52

53  
54 Also based on the data from the prefectures, retention rates for contractual workforce of subjects  
55  
56  
57  
58  
59  
60

1  
2  
3  
4  
5  
6 in subquota with scholarship and subjects with scholarship alone were calculated. The retention rate  
7  
8 is the percentage of graduates who are complying with the terms of being admitted to a subquota  
9  
10 and/or receiving scholarship. The retention rate of each group each year was calculated with  
11  
12 Kaplan-Meier survival analysis. The retention rates were compared between the two groups with the  
13  
14 log-rank test.  
15  
16  
17  
18  
19

20 Statistical analyses were done using SPSS version 24 (IBM-SPSS Japan, Tokyo) and R version  
21  
22 3.3.2 (R Foundation for Statistical Computing, Vienna, Austria). P values less than 0.05 (two-sided  
23  
24 test) were regarded as statistically significant.  
25  
26  
27  
28  
29  
30

## 31 **RESULTS**

### 32 **Response rates**

33  
34  
35  
36  
37 The response rates of prefectures and medical schools in each year are shown in Table 1. The  
38  
39 response rate is the percentage of those who returned a completed questionnaire to the study office  
40  
41 among all the prefectures or medical schools which have eligible subjects. The number of subjects in  
42  
43 all the responding prefectures or medical schools in each year is shown in Table 1. Almost all  
44  
45 prefectures and medical schools with eligible subjects participated (response rates 97.8-100%).  
46  
47  
48  
49  
50  
51  
52  
53

54 Table 1 here  
55  
56  
57  
58  
59  
60

### **Passing rates of the National Physician License Examination**

Passing rates of subquota with scholarship, subquota without scholarship, scholarship alone, and all new graduates of Japanese medical schools (control group) each year are shown in Figure 2A-D. Throughout the study period, the passing rates of subquota graduates with scholarship, subquota graduates without scholarship, and non-subquota with scholarship were higher than the passing rate of all the new medical graduates in Japan. The percentage of subquota with scholarship was significantly higher than the percentage of all new graduates in all the years (97.9, 96.7, 97.4 and 94.7% v.s. 93.9, 94.5, 94.3 and 91.8%, respectively). The passing rate of subquota with scholarship was the highest among all the groups except for 2017 in which the percentage of scholarship alone was the highest.

Figure 2A-D here

### **Retention rates for contractual work (non-buying-out rates)**

The retention rate, the 100% - scholarship buying-out rate, of subjects in subquota with scholarship and that of those in non-subquota with scholarship is shown in Figure 3A-D. Figure 3A-C shows the retention rates of the two groups who graduated in 2014, 2015 and 2016. Figure 3D

1  
2  
3  
4  
5  
6 shows the rates of all the graduates between 2014 and 2017. The retention rate varied by graduation  
7  
8  
9 year and at intervals after graduation. In all graduation years, the retention rate of subquota with  
10  
11 scholarship was higher than that of scholarship alone at the end of follow-up, but the difference was  
12  
13 not statistically significant (Figure 3A-C). The survival analysis including all the subjects who  
14  
15 obtained physician license between 2014 and 2017 showed that the retention rate 3.25 years after  
16  
17 graduation was 92.2% for those in subquota with scholarship and 89.9% for those with scholarship  
18  
19 alone (statistically not significant: Figure 3D).  
20  
21  
22  
23  
24  
25  
26  
27

28 Figure 3A-D here  
29  
30  
31  
32  
33

## 34 **DISCUSSION**

35  
36  
37 The results of this study showed that the graduates of regional subquota with scholarship  
38  
39 were more likely to pass the National License Examination for Physicians than the other new  
40  
41 graduates of medical schools. The passing rates of those in non-subquota with scholarship and  
42  
43 those in subquota without scholarship were the highest. The percentage of those who remained  
44  
45 in the contractual workforce accompanied with scholarship 3.25 years after graduation was  
46  
47  
48 92.2% among those of subquota with scholarship, and 89.9% among those with scholarship  
49  
50  
51 alone.  
52  
53  
54  
55  
56  
57  
58  
59  
60

1  
2  
3  
4  
5  
6 There has been a concern about the academic level of subquota entrants because they are  
7  
8 admitted to medical school under different criteria.<sup>14</sup> The results of this study, however, show  
9  
10 that the concern is invalid. In Japan the length of undergraduate medical education is six years,  
11  
12 which is long enough to obscure the correlation between academic performance at entrance and  
13  
14 that at graduation.<sup>21</sup> Also in the usual admission process, many applicants are examined over the  
15  
16 course of a few days, which forces medical schools to choose entrants solely based on their test  
17  
18 scores. Elements other than the written test score, such as the personal statement and interview  
19  
20 result, are not as valued. In contrast, the admission process in many of the regional subquotas is  
21  
22 a combined evaluation of the applicant's high school activities, a recommendation letter from  
23  
24 the high school, an interview, an academic test, and a personal statement. The variety of  
25  
26 elements valued in the process may have contributed to the better performance on the physician  
27  
28 license examination. Whether in a subquota or not, students with scholarship may be under  
29  
30 socioeconomic pressure to become a physician immediately. The results of this study offer a  
31  
32 warning to Japan's conventional medical school admission system. In the scheduled revision by  
33  
34 the government for the new university entrance system in 2021, the selection of medical school  
35  
36 applicants needs to be more effective.  
37  
38  
39  
40  
41  
42  
43  
44  
45  
46  
47  
48  
49

50  
51 There is a room for argument whether the contract retention rates shown in this study are  
52  
53 high or low. The results shown are the representative value of all the subjects in all prefectures  
54  
55  
56  
57  
58  
59  
60



1  
2  
3  
4  
5  
6 of Japan. In reality, however, there is a substantial difference among prefectures. It is thus  
7  
8  
9 necessary to evaluate the result in each prefecture or in each medical school. The retention rate  
10  
11 of graduates from Jichi Medical University, founded in 1972 solely to produce rural physicians  
12  
13 and became the model when making regional subquota systems all over the country, is 97%.<sup>22</sup>  
14  
15 The percentage is obviously higher than that of subquota graduates shown in this study.  
16  
17 However the total amount of prefecture scholarship given to a Jichi student for six years is 23  
18  
19 million yen (equivalent to USD 209,090), which is double the average amount of scholarship  
20  
21 for a subquota student: 12.2 million yen (USD 110,909).<sup>23,24</sup> In other words, we need to consider  
22  
23 both the financial burden of the country/prefecture and the risk of losing workers, in order to  
24  
25 make the subquota system both sustainable.  
26  
27  
28  
29  
30  
31  
32  
33

34 Internationally there are many financial incentive programmes to recruit physicians to  
35  
36 practice in rural areas.<sup>25,26</sup> The estimated retention rate of the pooled subjects of these  
37  
38 programmes was reportedly 71%.<sup>26</sup> The retention rate of subjects in state scholarship  
39  
40 programmes for medical students in the United States was 66.5%.<sup>27</sup> It is not so meaningful,  
41  
42 however, to compare the contract retention rate among programmes with different social and  
43  
44 cultural contexts. In Japan it is important to prolong the observation period of this study and  
45  
46 accumulate Japan's original data on its own unique subquota and scholarship system.  
47  
48  
49  
50  
51  
52

53 This study has the following limitations. First, as this study gathered information about  
54  
55  
56  
57  
58  
59  
60

1  
2  
3  
4  
5  
6 graduates, their academic performance and scholarship buy-out rate before graduation are  
7  
8 unknown. According to the Association of Japan Medical Colleges, the straight graduation rate,  
9  
10 which is the proportion of students who have finished their six-year medical program without  
11  
12 repeating a school year, of subquota students who entered in 2008 was 89.6% nationwide, which was  
13  
14 higher than the rate of all the medical school entrants in the year (85.4%). The rate of subquota  
15  
16 entrants in 2009, which was 89.0%, was also higher than that of all medical students (84.2%).<sup>24</sup> The  
17  
18 report also mentioned that 0.7% of undergraduate subquota students bought out their prefectural  
19  
20 scholarship each year.<sup>24</sup> This information should be added to the results of this study when  
21  
22 assessing the effectiveness of subquota and scholarship systems. The geographic location of the  
23  
24 subquota graduates and scholarship recipients are not shown in this study. Their location,  
25  
26 particularly after their contractual periods, is the most important outcome of these systems, and  
27  
28 will be shown in the near future based on the data from the ongoing cohort study.  
29  
30  
31  
32  
33  
34  
35  
36  
37  
38

39  
40 Regional subquotas and prefecture scholarships are based on temporary legislation by the  
41  
42 national government, and thus the systems will be revised starting in 2018. In most of the  
43  
44 prefectures, however, the first generation of the subquota entrants is still undergoing its clinical  
45  
46 training or have just started their practice in rural areas. So, as of this writing (summer 2017),  
47  
48 we cannot assess the final outcomes of these systems. All we can do is to collect intermediate  
49  
50 outcomes like those shown in this study, analyse them in a variety of dimensions, and engage in  
51  
52  
53  
54  
55  
56  
57  
58  
59  
60

1  
2  
3  
4  
5  
6 evidence-based decision making for the future national policies while accumulating data for the  
7  
8 next assessment.  
9

## 10 11 12 13 14 **CONCLUSION**

15  
16  
17 The passing rate of the entrants to the *chiikiwaku*, regional subquota of medical schools, for the  
18  
19 National License Examination for Physicians was higher than the rate of non-subquota medical  
20  
21 graduates. The passing rate of prefecture scholarship recipients was also higher than non-recipients.  
22  
23 More than 90% of subquota physicians with scholarship were complying with the terms of their  
24  
25 contract more than three years after obtaining the physician license. The imminent revision of the  
26  
27 national policy regarding the subquota and scholarship systems should be based on these  
28  
29 intermediate outcomes.  
30  
31  
32  
33  
34  
35  
36  
37  
38  
39

## 40 **Contributors**

41  
42 MM contributed to the study design, tools, study administration, data collection, analysis,  
43  
44 interpretation of data, and writing the draft. KT and TM contributed to the study design, tools, study  
45  
46 administration, data interpretation, and writing the draft. ST and KI contributed to the study design,  
47  
48 interpretation of data, and writing the draft. SK contributed to the analysis and writing the draft, TO  
49  
50 and SI contributed to the study administration, data collection.  
51  
52  
53  
54  
55  
56  
57  
58  
59  
60

**Funding**

This study is funded by the Ministry of Education, Culture, Sports, Science and Technology KAKENHI Grant-in-Aid for Scientific Research (C), Grant Number (25460803).

**Competing interests**

None

**Ethics approval**

Ethical approval was granted by the Ethics Committee for epidemiological research of Hiroshima University (ref. no. 778) and the Research Ethics Committee of Nagasaki University Graduate School of Biomedical Sciences (ref. no. 13091342).

**Data sharing statement**

Conditions of the ethical approvals permit the cohort office (Department of Community-Based Medical System, Graduate School of Biomedical and Health Sciences, Hiroshima University) and the sub-office (Department of Community Medicine, Nagasaki University Graduate School of Biomedical Science) to share the cohort data. Aggregated data are shared with stakeholders or other researchers.

**REFERENCES**

1. Matsumoto M, Inoue K, Kajii E, Takeuchi K. Retention of physicians in rural Japan: concerted efforts of the government, prefectures, municipalities and medical schools. *Rural Remote Health*. 2010;10:1432.
2. Matsumoto M, Takeuchi K, Yokobayashi K, Tazuma S. Geographic maldistribution of physicians in Japan : increasing the number of generalists is one solution. *J Gen Fam Med* 2015;16:1-5.
3. Inoue K, Matsumoto M, Toyokawa S, Kobayashi Y. Transition of physician distribution (1980-2002) in Japan and factors predicting future rural practice. *Rural Remote Health*. 2009;9:1070.
4. Toyabe S. Trend in geographic distribution of physicians in Japan. *Int J Equity Health*. 2009;8:5.
5. Tanihara S, Kobayashi Y, Une H, Kawachi I. Urbanization and physician maldistribution: a longitudinal study in Japan. *BMC Health Serv Res*. 2011;11:260.
6. Kobayashi Y, Takaki H. Geographic distribution of physicians in Japan. *Lancet*. 1992;340:1391-3.
7. Matsumoto M, Inoue K, Bowman R, Noguchi S, Toyokawa S, Kajii E. Geographical distributions of physicians in Japan and US: Impact of healthcare system on physician dispersal pattern. *Health Policy* 2010;96:255-61.
8. Hara K, Otsubo T, Kunisawa S, Imanaka Y. Examining sufficiency and equity in the geographic distribution of physicians in Japan: a longitudinal study. *BMJ Open*. 2017;7:e013922.
9. Iwata K, Mosby DJ, Sakane M. Board certification in Japan: corruption and near-collapse of reform. *Postgrad Med J*. 2017;93:436.
10. Japan Association of City Mayors. Kokumin-fuzai no shinsenmoni-seido wo kigushi sessoku ni susumeru kotoni hantaisuru kinkyu youbou (Objecting the new programs for producing specialist doctors.). 2017. [http://www.mayors.or.jp/p\\_opinion/documents/290412shinsenmoni\\_kinkyuyoubou.pdf](http://www.mayors.or.jp/p_opinion/documents/290412shinsenmoni_kinkyuyoubou.pdf). (Accessed April 25, 2017).
11. Ministry of Health, Labour and Welfare. Shakai-hosyou-shingikai iryoubukai dai46kai gijiroku (Discussion record of the 46th meical group meeting of the Social Security Committee). 2016. [http://www.mhlw.go.jp/file/05-Shingikai-12601000-Seisakutoukatsukan-Sanjikanshitsu\\_Shakaihoshoutantou/gijiroku46.pdf](http://www.mhlw.go.jp/file/05-Shingikai-12601000-Seisakutoukatsukan-Sanjikanshitsu_Shakaihoshoutantou/gijiroku46.pdf). (Accessed April 25, 2017).
12. Ministry of Health Labour and Welfare. Shakai-hosyou-shingikai iryoubukai dai47kai gijiroku (Discussion record of the 47th meical group meeting of the Social Security Committee). 2016. <http://www.mhlw.go.jp/stf/shingi2/0000149697.html>. (Accessed April 25,

- 2017)
13. Matsumoto M, Inoue K, Takeuchi K. Quality of care in Japan: an additional strategy. *Lancet*. 2011;378:e17.
  14. Matsumoto M, Takeuchi K, Tanaka J, et al. Follow-up study of the regional quota system of Japanese medical schools and prefecture scholarship programmes: a study protocol. *BMJ Open*. 2016;6:e011165.
  15. Matsumoto M, Mizooka M, Tazuma S. General practice departments of university hospitals and certified training programs for general practitioners in Japan: a nationwide questionnaire survey. *J Gen Fam Med*. 2017; 00: 1-5.
  16. Ministry of Education, Culture, Sports, Science and Technology. Heisei28nendo igakubu nyugakuteiinanzou ni tuite (Increase in the number of entrants to medical schools in 2016). 2016.  
[http://www.mext.go.jp/b\\_menu/houdou/27/10/\\_\\_\\_icsFiles/afieldfile/2015/10/23/1363060\\_4\\_1.pdf](http://www.mext.go.jp/b_menu/houdou/27/10/___icsFiles/afieldfile/2015/10/23/1363060_4_1.pdf). (Accessed June 22, 2016).
  17. Sapix Yozemi Group. 2016-nendo kokukouritsudaigaku-nyushi joukyou to bunseki (Results and analysis of public medical school admission in 2016). 2016.  
<http://juken.y-sapix.com/articles/3640.html>. (Accessed August 19, 2017).
  18. Sapix Yozemi Group. 2016-nendo shiritsudaigaku-nyushi joukyou to bunseki (Results and analysis of private medical school admission in 2016). 2016.  
<http://juken.y-sapix.com/articles/3668.html>. (Accessed August 19, 2017).
  19. Ministry of Health, Labour and Welfare. Kokka-shiken-gokaku-happyou (Results of the national license examinations). 2017.  
[http://www.mhlw.go.jp/kouseiroudoushou/shikaku\\_shiken/goukaku.html](http://www.mhlw.go.jp/kouseiroudoushou/shikaku_shiken/goukaku.html). (Accessed August 15, 2017).
  20. TECOM Inc. Kokkashiken-jouhou dai 108-111 kai (Information on the 108th-111th national license examinations). 2017. <https://www2.tecomgroup.jp/igaku/topics/kokushi/>. (Accessed August 15, 2017).
  21. Sakemi T. Heisei 14-15nendo igakubu-igakuka-nyugakusya no nyugakugo-seiseki ni kansuru bunseki (Academic performance of medical students after admission). *Daigakukyoku Nempo*. 2010;6:1-13.
  22. Matsumoto M, Kajii E. Medical education program with obligatory rural service: analysis of factors associated with obligation compliance. *Health Policy* 2009;90(2-3):125-32.
  23. Jichi Medical University. Syugaku-shikin, shogakushikin (Scholarship system). 2017.  
<https://www.jichi.ac.jp/exam/medicine/campus/backup.html>. (Accessed August 15, 2017).
  24. Association of Japan Medical Colleges. Heisei 28 nendo chiikiwaku-nyugaku-seido to chiiki-iryō-shien-senta no jitsujou ni kansuru chousahoukoku (Survey report on regional

- subquota admission and community health support centers in 2016.) Tokyo: AJMC;2017.
25. Frehywot S, Mullan F, Payne PW, Ross H. Compulsory service programmes for recruiting health workers in remote and rural areas: do they work? *Bull World Health Org.* 2010;88:364-70.
  26. Barnighausen T, Bloom DE. Financial incentives for return of service in underserved areas: a systematic review. *BMC health serv res.* 2009;9:86.
  27. Pathman DE, Konrad TR, King TS, Taylor DH, Jr., Koch GG. Outcomes of states' scholarship, loan repayment, and related programs for physicians. *Med Care.* 2004;42:560-8.

**Table 1. Response rates of prefectures and medical schools**

| Year | Prefectures |               |            | Medical Schools |               |             |
|------|-------------|---------------|------------|-----------------|---------------|-------------|
|      | N*          | Response rate | Subjects** | N*              | Response rate | Subjects*** |
| 2014 | 36/36       | 100%          | 466        | 19/19           | 100%          | 166         |
| 2015 | 45/46       | 97.8%         | 696        | 22/22           | 100%          | 253         |
| 2016 | 46/47       | 97.8%         | 838        | 29/29           | 100%          | 308         |
| 2017 | 47/47       | 100%          | 985        | 31/31           | 100%          | 382         |

\*Both the number of eligible prefectures (medical schools) and that of responded prefectures (medical schools) are shown.

\*\*Subjects in prefectures are those in subquota with scholarship or those with scholarship alone.

\*\*\*Subjects in medical schools are in subquota without scholarship.

### Figure legends

Figure 1. Study subjects and data collection.

Figure 2. Passing rates of the National Licence Examination for Physicians (A: 2014, B: 2015, C: 2016, D: 2017). Control data were from the Ministry of Health, Labour and Welfare.<sup>19,20</sup> Rates in 2014 and 2015 have been reported previously.<sup>14</sup>

1  
2  
3  
4  
5  
6  
7  
8  
9 Figure 3. Retention rates of subjects in subquota with scholarship and those in non-subquota with  
10 scholarship (scholarship alone). (A: graduates in 2014, B: 2015, C: 2016, D: 2014-2017)  
11  
12  
13  
14  
15  
16  
17  
18  
19  
20  
21  
22  
23  
24  
25  
26  
27  
28  
29  
30  
31  
32  
33  
34  
35  
36  
37  
38  
39  
40  
41  
42  
43  
44  
45  
46  
47  
48  
49  
50  
51  
52  
53  
54  
55  
56  
57  
58  
59  
60



1  
2  
3  
4  
5  
6  
7  
8  
9  
10  
11  
12  
13  
14  
15  
16  
17  
18  
19  
20  
21  
22  
23  
24  
25  
26  
27  
28  
29  
30  
31  
32  
33  
34  
35  
36  
37  
38  
39  
40  
41

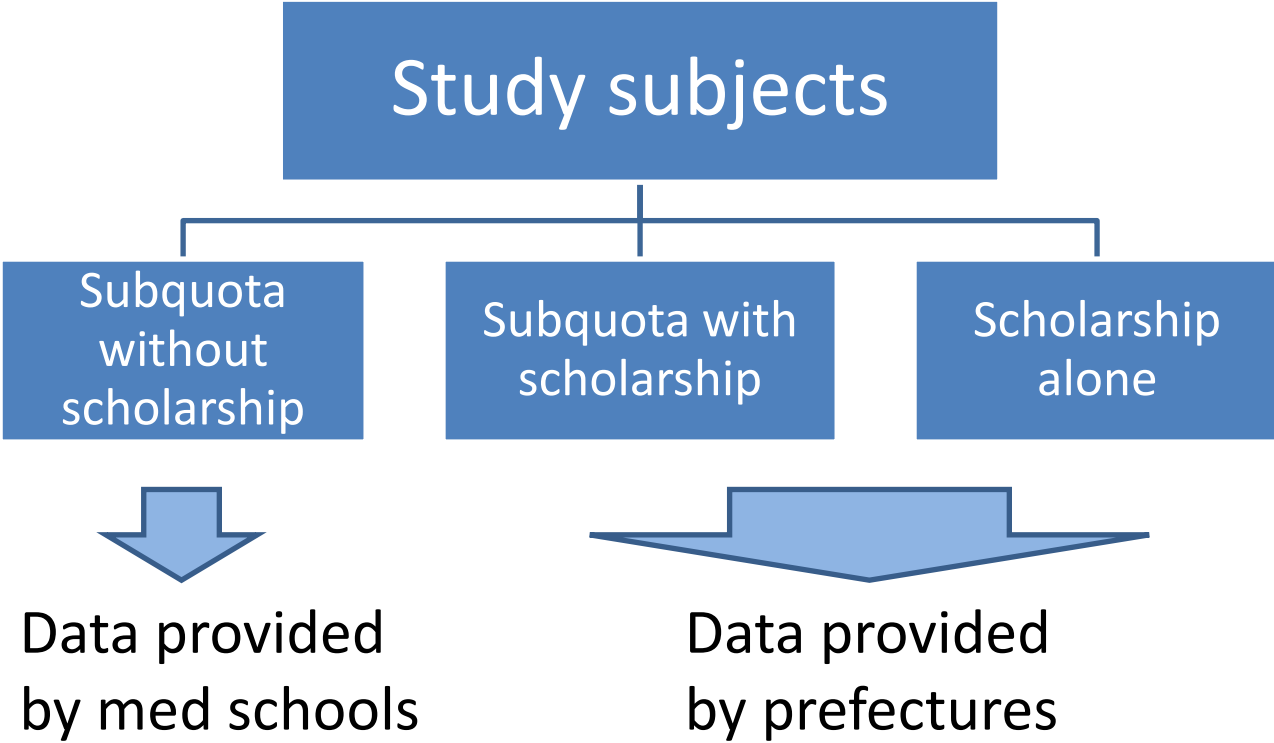

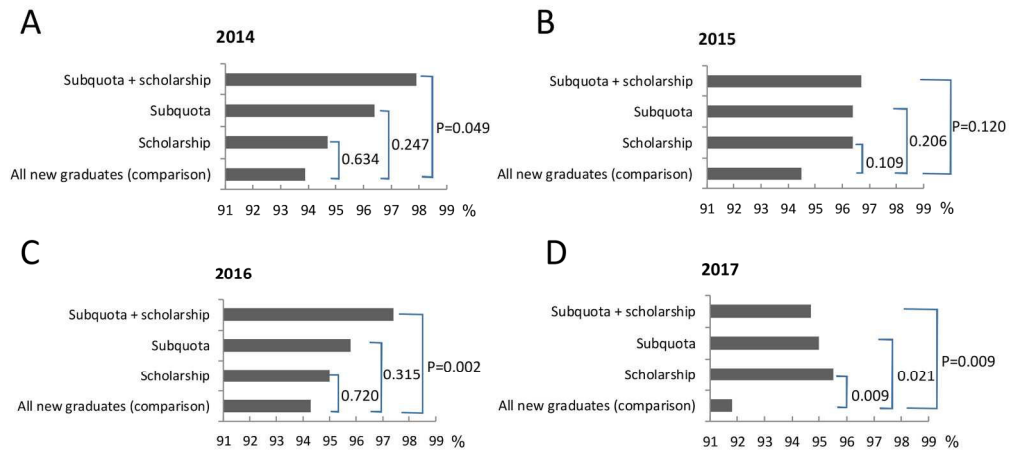

Figure 2. Passing rates of the National Licence Examination for Physicians (A: 2014, B: 2015, C: 2016, D: 2017). Control data were from the Ministry of Health, Labour and Welfare. Rates in 2014 and 2015 have been reported previously.

170x80mm (300 x 300 DPI)

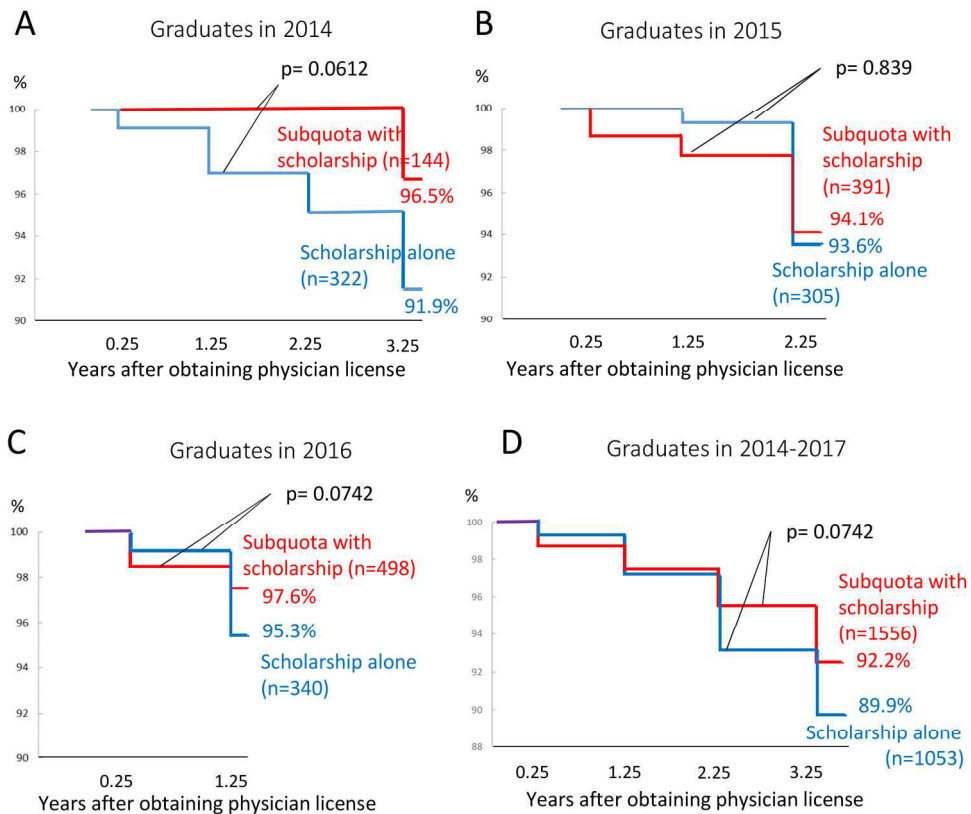

Figure 3. Retention rates of subjects in subquota with scholarship and those in non-subquota with scholarship (scholarship alone). (A: graduates in 2014, B: 2015, C: 2016, D: 2014-2017)

170x140mm (300 x 300 DPI)

**STROBE 2007 (v4) Statement—Checklist of items that should be included in reports of *cross-sectional studies***

| Section/Topic                | Item # | Recommendation                                                                                                                                                                       | Reported on page #                             |
|------------------------------|--------|--------------------------------------------------------------------------------------------------------------------------------------------------------------------------------------|------------------------------------------------|
| Title and abstract           | 1      | (a) Indicate the study's design with a commonly used term in the title or the abstract                                                                                               | 2                                              |
|                              |        | (b) Provide in the abstract an informative and balanced summary of what was done and what was found                                                                                  | 2-3                                            |
| <b>Introduction</b>          |        |                                                                                                                                                                                      |                                                |
| Background/rationale         | 2      | Explain the scientific background and rationale for the investigation being reported                                                                                                 | 5-8                                            |
| Objectives                   | 3      | State specific objectives, including any prespecified hypotheses                                                                                                                     | 8                                              |
| <b>Methods</b>               |        |                                                                                                                                                                                      |                                                |
| Study design                 | 4      | Present key elements of study design early in the paper                                                                                                                              | 8-9                                            |
| Setting                      | 5      | Describe the setting, locations, and relevant dates, including periods of recruitment, exposure, follow-up, and data collection                                                      | 8-9                                            |
| Participants                 | 6      | (a) Give the eligibility criteria, and the sources and methods of selection of participants                                                                                          | 9-10                                           |
| Variables                    | 7      | Clearly define all outcomes, exposures, predictors, potential confounders, and effect modifiers. Give diagnostic criteria, if applicable                                             | 9-10                                           |
| Data sources/<br>measurement | 8*     | For each variable of interest, give sources of data and details of methods of assessment (measurement). Describe comparability of assessment methods if there is more than one group | 9-11                                           |
| Bias                         | 9      | Describe any efforts to address potential sources of bias                                                                                                                            | 8-9                                            |
| Study size                   | 10     | Explain how the study size was arrived at                                                                                                                                            | Not needed. This study is a nationwide census. |
| Quantitative variables       | 11     | Explain how quantitative variables were handled in the analyses. If applicable, describe which groupings were chosen and why                                                         | 10-11                                          |
| Statistical methods          | 12     | (a) Describe all statistical methods, including those used to control for confounding                                                                                                | 10-11                                          |
|                              |        | (b) Describe any methods used to examine subgroups and interactions                                                                                                                  | 10-11                                          |
|                              |        | (c) Explain how missing data were addressed                                                                                                                                          | 11                                             |
|                              |        | (d) If applicable, describe analytical methods taking account of sampling strategy                                                                                                   | 11                                             |

|                          |     |                                                                                                                                                                                                              |              |
|--------------------------|-----|--------------------------------------------------------------------------------------------------------------------------------------------------------------------------------------------------------------|--------------|
|                          |     | (e) Describe any sensitivity analyses                                                                                                                                                                        | Not needed.  |
| <b>Results</b>           |     |                                                                                                                                                                                                              |              |
| Participants             | 13* | (a) Report numbers of individuals at each stage of study—eg numbers potentially eligible, examined for eligibility, confirmed eligible, included in the study, completing follow-up, and analysed            | 11           |
|                          |     | (b) Give reasons for non-participation at each stage                                                                                                                                                         | 11           |
|                          |     | (c) Consider use of a flow diagram                                                                                                                                                                           | 9            |
| Descriptive data         | 14* | (a) Give characteristics of study participants (eg demographic, clinical, social) and information on exposures and potential confounders                                                                     | 11           |
|                          |     | (b) Indicate number of participants with missing data for each variable of interest                                                                                                                          | 11           |
| Outcome data             | 15* | Report numbers of outcome events or summary measures                                                                                                                                                         | 11-13        |
| Main results             | 16  | (a) Give unadjusted estimates and, if applicable, confounder-adjusted estimates and their precision (eg, 95% confidence interval). Make clear which confounders were adjusted for and why they were included | 11-13        |
|                          |     | (b) Report category boundaries when continuous variables were categorized                                                                                                                                    | 11-13        |
|                          |     | (c) If relevant, consider translating estimates of relative risk into absolute risk for a meaningful time period                                                                                             | Not relevant |
| Other analyses           | 17  | Report other analyses done—eg analyses of subgroups and interactions, and sensitivity analyses                                                                                                               | 11-13        |
| <b>Discussion</b>        |     |                                                                                                                                                                                                              |              |
| Key results              | 18  | Summarise key results with reference to study objectives                                                                                                                                                     | 13           |
| Limitations              | 19  | Discuss limitations of the study, taking into account sources of potential bias or imprecision. Discuss both direction and magnitude of any potential bias                                                   | 15-16        |
| Interpretation           | 20  | Give a cautious overall interpretation of results considering objectives, limitations, multiplicity of analyses, results from similar studies, and other relevant evidence                                   | 13-16        |
| Generalisability         | 21  | Discuss the generalisability (external validity) of the study results                                                                                                                                        | 15           |
| <b>Other information</b> |     |                                                                                                                                                                                                              |              |
| Funding                  | 22  | Give the source of funding and the role of the funders for the present study and, if applicable, for the original study on which the present article is based                                                | 17           |

\*Give information separately for cases and controls in case-control studies and, if applicable, for exposed and unexposed groups in cohort and cross-sectional studies.

**Note:** An Explanation and Elaboration article discusses each checklist item and gives methodological background and published examples of transparent reporting. The STROBE checklist is best used in conjunction with this article (freely available on the Web sites of PLoS Medicine at <http://www.plosmedicine.org/>, Annals of Internal Medicine at <http://www.annals.org/>, and Epidemiology at <http://www.epidem.com/>). Information on the STROBE Initiative is available at [www.strobe-statement.org](http://www.strobe-statement.org).

For peer review only

1  
2  
3  
4  
5  
6  
7  
8  
9  
10  
11  
12  
13  
14  
15  
16  
17  
18  
19  
20  
21  
22  
23  
24  
25  
26  
27  
28  
29  
30  
31  
32  
33  
34  
35  
36  
37  
38  
39  
40  
41  
42  
43  
44  
45  
46  
47

# BMJ Open

## Results of physician license examination and scholarship contract compliance by the graduates of regional quotas in Japanese medical schools

|                                 |                                                                                                                                                                                                                                                                                                                                                                                                                                                                                                                                                                                                                                                                                                             |
|---------------------------------|-------------------------------------------------------------------------------------------------------------------------------------------------------------------------------------------------------------------------------------------------------------------------------------------------------------------------------------------------------------------------------------------------------------------------------------------------------------------------------------------------------------------------------------------------------------------------------------------------------------------------------------------------------------------------------------------------------------|
| Journal:                        | <i>BMJ Open</i>                                                                                                                                                                                                                                                                                                                                                                                                                                                                                                                                                                                                                                                                                             |
| Manuscript ID                   | bmjopen-2017-019418.R1                                                                                                                                                                                                                                                                                                                                                                                                                                                                                                                                                                                                                                                                                      |
| Article Type:                   | Research                                                                                                                                                                                                                                                                                                                                                                                                                                                                                                                                                                                                                                                                                                    |
| Date Submitted by the Author:   | 23-Oct-2017                                                                                                                                                                                                                                                                                                                                                                                                                                                                                                                                                                                                                                                                                                 |
| Complete List of Authors:       | Matsumoto, Masatoshi; Hiroshima Daigaku, Community-based Medical System<br>Takeuchi, keisuke<br>Owaki, Tetsuhiro; Graduate School of Medical Sciences, Kagoshima University, Education Center for Doctors in Remote Islands and Rural Areas<br>Iguchi, Seitaro; Niigata University Graduate School of Medical & Dental Sciences, Department of Community Medicine<br>Inoue, Kazuo; Chiba Medical Center, Teikyo University School of Medicine, Department of Community Medicine<br>Kashima, Saori; Hiroshima Daigaku, Public Health and Health Policy<br>Tazuma, Susumu; Hiroshima University Hospital, General Internal Medicine<br>Maeda, Takahiro; Nagasaki University, Department of Community Medicine |
| <b>Primary Subject Heading</b>: | Health policy                                                                                                                                                                                                                                                                                                                                                                                                                                                                                                                                                                                                                                                                                               |
| Secondary Subject Heading:      | Health policy, Medical education and training                                                                                                                                                                                                                                                                                                                                                                                                                                                                                                                                                                                                                                                               |
| Keywords:                       | physician, geography, MEDICAL EDUCATION & TRAINING, Health policy < HEALTH SERVICES ADMINISTRATION & MANAGEMENT, Japan                                                                                                                                                                                                                                                                                                                                                                                                                                                                                                                                                                                      |
|                                 |                                                                                                                                                                                                                                                                                                                                                                                                                                                                                                                                                                                                                                                                                                             |

SCHOLARONE™  
Manuscripts

Results of physician license examination and scholarship contract compliance by the graduates of regional quotas in Japanese medical schools

Masatoshi Matsumoto<sup>1</sup>, Keisuke Takeuchi<sup>1</sup>, Tetsuhiro Owaki<sup>2</sup>, Seitaro Iguchi<sup>3</sup>, Kazuo Inoue<sup>4</sup>, Saori Kashima<sup>5</sup>, Susumu Tazuma<sup>6</sup>, Takahiro Maeda<sup>7</sup>

1. Department of Community-Based Medical System, Institute of Biomedical and Health Sciences, Hiroshima University, Hiroshima, Japan

2. Education Center for Doctors in Remote Islands and Rural Areas, Graduate School of Medical Sciences, Kagoshima University, Kagoshima, Japan

3. Department of Community Medicine, Niigata University Graduate School of Medical & Dental Sciences, Niigata, Japan

4. Department of Community Medicine, Chiba Medical Center, Teikyo University School of Medicine, Chiba, Japan

5. Department of Public Health and Health Policy, Graduate School of Biomedical and Health Sciences, Hiroshima University, Hiroshima, Japan

6. Department of General Internal Medicine, Hiroshima University Hospital and Graduate School of Biomedical & Health Sciences, Hiroshima, Japan

7. Department of Community Medicine, Nagasaki University Graduate School of Biomedical Science, Nagasaki, Japan

Corresponding author: Masatoshi Matsumoto

Department of Community Based Medical System, Institute of Biomedical and Health Sciences, Hiroshima University

1-2-3 Kasumi, Minami-ku, Hiroshima, 734-8551 JAPAN

Phone: +81-82-257-5894 Fax: +81-82 257-5895 Email: matmo10@jb3.so-net.ne.jp

Keywords: physicians; geography; medical education; health policy; Japan

Word count: 2856



## ABSTRACT

### Objectives:

Responding to the serious shortage of physicians in rural areas, the Japanese government has aggressively increased the number of entrants to medical schools since 2008, mostly as a *chiikiwaku*, entrants filling a regional quota. The quota has spread to most medical schools, and these entrants occupied 16% of all medical school seats in 2016. Most of these entrants were admitted to medical school with a scholarship with the understanding that after graduation they will practice in designated areas of their home prefectures for several years. The quota and scholarship programmes will be revised by the government starting in 2018. This study evaluates the intermediate outcomes of these programmes.

**Design:** Cross-sectional survey to all prefectural governments and medical schools every year from 2014 to 2017 to obtain data on medical graduates.

**Settings:** Nationwide

**Participants:** All quota and non-quota graduates with prefecture scholarship in each prefecture, and all the quota graduates without scholarship in each medical school.

**Primary outcome measures:** Passing rate of the National License Examination for Physicians, and the percentage of graduates who have not bought out the scholarship contract after graduation.

**Results:** Most Japan's prefectures and medical schools participated in this study (97.8%-100%).

1  
2  
3  
4  
5  
6 Quota graduates with scholarship were significantly more likely to pass the National License  
7  
8 Examination than the other medical graduates in Japan at all the years (97.9, 96.7, 97.4 and 94.7%  
9  
10 versus 93.9, 94.5, 94.3 and 91.8%, respectively). The percentage of quota graduates with scholarship  
11  
12 who remained in the scholarship contract 3 years after graduation was 92.2%, and 89.9% for  
13  
14 non-quota graduates with scholarship.  
15  
16  
17  
18  
19

20 **Conclusions:** Quota entrants showed better academic performance than their peers. Most of the  
21  
22 quota graduates remained in the contractual workforce. The imminent revision of the national policy  
23  
24 regarding quota and scholarship programmes need to be based on this evidence.  
25  
26  
27  
28  
29  
30  
31  
32  
33  
34  
35  
36  
37  
38  
39  
40  
41  
42  
43  
44  
45  
46  
47  
48  
49  
50  
51  
52  
53  
54  
55  
56  
57  
58  
59  
60

### Strengths and limitations of this study

- This study shows intermediate outcomes of quota admission programmes of medical schools and prefecture scholarship programmes, one of the largest national policies enacted to improve Japan's geographic maldistribution of physicians.
- With support from concerned ministries and the representative body of medical schools, almost all of Japan's prefectural governments and medical schools participated in this study, which enabled the collection of reliable information on study subjects every year.
- The passing rates of the National License Examination for Physicians of the quota graduates with scholarship, quota graduates without scholarship, and non-quota graduates with scholarship were compared with that of the other medical graduates in Japan. The percentages of quota and non-quota graduates with scholarship who have not bought out the scholarship contract were calculated and compared.
- This study is part of an ongoing nationwide cohort study, which will also examine the geographic location of quota graduates and scholarship recipients in the long run.

## INTRODUCTION

### Geographic distribution of physicians in Japan

The geographic inequity of physician distribution has long been a social problem in Japan and in

1  
2  
3  
4  
5  
6 many other countries. Japan's national and local governments have attempted to solve this problem  
7  
8  
9 by establishing public hospitals and clinics in rural areas since 1950s, creating at least one medical  
10  
11 school in each prefecture in 1960s and 1970s, including Jichi Medical University in 1972 which is  
12  
13 exclusively responsible for producing rural physicians.<sup>1,2</sup>  
14  
15

16  
17 Over the long term, these policies have increased the number of physicians in rural areas,<sup>3</sup> but  
18  
19 many studies revealed that the disparity in proportional representation of urban and rural physicians  
20  
21 has persisted.<sup>3-8</sup> This maldistribution of physicians has worsened since 2004 when the new residency  
22  
23 training programme for the physicians within the first two years after graduation was introduced  
24  
25 nationwide.<sup>4,8</sup> Furthermore, additional specialty training for physicians after residency training,  
26  
27 scheduled to start in 2018, has caused concern among health care professionals and policy makers  
28  
29 that young physicians will be even more likely to cluster in large cities.<sup>9-12</sup>  
30  
31  
32  
33  
34  
35  
36  
37  
38  
39

#### 40 ***Chiikiwaku* (regional quota) and prefecture scholarship as a national policy**

41  
42 In response to such a situation, the national government has aggressively increased the number  
43  
44 of entrants to medical schools since 2008. Most of these entrants were admitted as a *chiikiwaku*, a  
45  
46 regional quota of a medical school. The model of these quotas was Jichi Medical University. The  
47  
48 quota had spread to 67 of the 80 medical schools by the end of 2016.<sup>13</sup> The quota is a special  
49  
50 admission quota of a medical school in which entrants were admitted under the condition that they  
51  
52  
53  
54  
55  
56  
57  
58  
59  
60

1  
2  
3  
4  
5  
6 practice in designated areas of their home prefectures, usually in rural areas in exchange for a  
7  
8 scholarship by the prefectural government.<sup>14</sup> The scholarship is given for the all six years of  
9  
10 undergraduate medical education, and the graduate is required to work in the prefecture for nine  
11  
12 years after graduation including four years in rural areas of the prefecture. The prefecture  
13  
14 governments allocate a budget for the scholarship according to the national policy. Some medical  
15  
16 schools have a regional quota without the scholarship. Entrants under this form of quota thus are  
17  
18 not contractually required to work in designated areas though they are expected to do so.<sup>15</sup> The  
19  
20 number of entrants to any form of regional quota is now 1504, accounting for 16% of all medical  
21  
22 school students in Japan.<sup>16,17</sup>  
23  
24  
25  
26  
27  
28  
29  
30

31 Apart from the scholarship coupled with the quota admission, there are scholarship programmes  
32  
33 of prefectural governments for non-*chiikiwaku* students. These scholarships are also based in the  
34  
35 national policy. The scholarship is given to a medical student who has been admitted to a medical  
36  
37 school through a conventional admission process and then applies to the scholarship programme.  
38  
39 The recipients of these scholarships are also required to work in the designated areas of the  
40  
41 prefecture for a certain amount of time, usually 1.5 times the length of the term of the scholarship.  
42  
43  
44  
45  
46  
47  
48 Half of that contractual period is to be spent practicing in rural areas of the prefecture.<sup>15</sup>  
49  
50  
51  
52  
53

#### 54 **Academic performance and compliance of scholarship contract**

55  
56  
57  
58  
59  
60

1  
2  
3  
4  
5  
6 Admission to medical schools in Japan has been highly competitive. In 2016, one in four  
7  
8 applicants of public medical schools and one in 16 applicants of private medical schools were  
9  
10 accepted.<sup>18,19</sup> Medical schools have not traditionally imposed restrictions on the geographic  
11  
12 background of applicants, so each medical school, even rural ones, attracts applicants from all over  
13  
14 Japan. Most the medical schools require a few days of written tests coupled with a short interview of  
15  
16 all the applicants, so given the lack of time for interviews, admission decisions are largely based on  
17  
18 scores of written test.  
19  
20  
21  
22  
23  
24

25 Entrance examination for regional quota is different. Most medical schools admit students only  
26  
27 from the prefecture in which the students live and/or from which the scholarship is given. In addition,  
28  
29 many medical schools consider only applicants who have been recommended by their high schools.  
30  
31 Thus there are far fewer applicants to the quotas. The application process for quota applicants is  
32  
33 usually a combination of written test, academic records in the high school, a personal statement, and  
34  
35 an interview. The academic test thus carries less weight as compared with the conventional  
36  
37 admission process. Because of these differences, the general population and medical educators are  
38  
39 concerned about the academic performance of quota entrants. In addition, there is a concern that  
40  
41 many quota entrants may buy out their contract to avoid practising in the prefecture and/or in rural  
42  
43 areas.<sup>15</sup> However, so far, no researchers seem to have compared the academic and contractual  
44  
45 outcomes of quota and non-quota students in Japan.  
46  
47  
48  
49  
50  
51  
52  
53  
54  
55  
56  
57  
58  
59  
60

## Objectives of this study

In this study we compared the results of the National License Examination for Physicians among graduates of quota with scholarship, quota without scholarship, non-quota with scholarship and all the other new medical graduates in Japan. We also examined the percentages of those graduates who have not bought out the scholarship. We assessed the intermediate outcomes of quota and scholarship programmes, so that the results can be used to inform political decision-makers for future revision of the quota and scholarship programs.

## METHODS

### Design and settings

This study is a part of the nationwide cohort study conducted by the Japanese Council for Community-based Medical Education (JCCME).<sup>15</sup> Yearly cross-sectional outcomes of the cohort study are reported in this study. The study period is from 2014 to 2017. The study includes three groups of subjects: quota graduates with scholarship, non-quota graduates with scholarship (scholarship alone), and quota graduates without scholarship (quota alone). Data on the former two groups were collected from prefectures and that on the last group were collected from medical schools (Figure 1).

1  
2  
3  
4  
5  
6  
7  
8  
9  
10  
11  
12  
13  
14  
15  
16  
17  
18  
19  
20  
21  
22  
23  
24  
25  
26  
27  
28  
29  
30  
31  
32  
33  
34  
35  
36  
37  
38  
39  
40  
41  
42  
43  
44  
45  
46  
47  
48  
49  
50  
51  
52  
53  
54  
55  
56  
57  
58  
59  
60

Figure 1 here

Every November, the cohort study office of JCCME sent a pre-survey questionnaire to all the 47 prefectures and all the 77 medical schools except for Jichi Medical University, National Defence Medical College, and University of Occupational and Environmental Health to ask which prefectures and medical schools have eligible subjects. Every year all the prefectures and medical schools responded to this. In June of the survey year, the study office sends a survey questionnaire to each prefectural government to obtain information on the number of new graduates who had received scholarship, the number who passed the National License Examination for Physicians, and the number who have bought out the scholarship. The cohort office sends a questionnaire to each medical school to obtain information on the number of quota students without scholarship and number who passed the National License Examination for Physicians. The Ministry of Health, Labour and Welfare, the Ministry of Education Culture, Sports, Science and Technology, and the Association of Japan Medical Colleges supported this study by requesting prefectures and/or medical schools to participate.

#### **Definitions of quota and scholarship**



1  
2  
3  
4  
5  
6 In this study, a quota student is one whose “geographic background or location of graduated high  
7  
8 schools of applicants are restricted and/or working place or specialty after graduation is clearly  
9  
10 specified.” A scholarship is “given by a prefecture to a medical student which needs not to be paid  
11  
12 back if the student works in designated areas by the prefecture for a certain period.”  
13  
14  
15  
16  
17  
18  
19

### 20 **Statistical analyses**

21  
22  
23 Based on the data obtained from the prefectures and medical schools, passing rates of the  
24  
25 National License Examination for Physicians were calculated for the subjects in quota with  
26  
27 scholarship, quota without scholarship (quota alone), and non-quota with scholarship (scholarship  
28  
29 alone). The rates in 2014 and 2015 have been reported previously,<sup>15</sup> and in this study, results in 2016  
30  
31 and 2017 were added. These rates were compared with the passing rate of all the other medical  
32  
33 graduates in Japan. The passing rate of the other graduates was calculated by subtracting the  
34  
35 numbers of passed and failed subjects in quota with scholarship, quota alone and scholarship alone  
36  
37 from those of all new graduates in Japan reported every year by the Ministry of Health, Labour and  
38  
39 Welfare.<sup>20,21</sup> The comparisons were conducted with the Fisher’s exact test for a part of 2014 analysis  
40  
41 because there were fewer than 5 failed subjects in quota with scholarship. All the other comparisons  
42  
43 were conducted with the chi-square test of independence.  
44  
45  
46  
47  
48  
49  
50  
51  
52

53 Also based on the data from the prefectures, retention rates for contractual workforce of subjects  
54  
55  
56  
57  
58  
59  
60

1  
2  
3  
4  
5  
6 in quota with scholarship and subjects with scholarship alone were calculated. The retention rate is  
7  
8 the percentage of graduates who are complying with the terms of being admitted to a quota and/or  
9  
10 receiving scholarship. The retention rate of each group was calculated in each cohort of graduation  
11  
12 year. The retention rate of all those who graduated between 2014 and 2017 was also calculated with  
13  
14 Kaplan-Meier survival analysis in which subjects with various observation periods were analysed.  
15  
16  
17  
18  
19  
20 The retention rates were compared between the two groups with the log-rank test.  
21  
22

23 Statistical analyses were done using SPSS version 24 (IBM-SPSS Japan, Tokyo) and R version  
24  
25 3.3.2 (R Foundation for Statistical Computing, Vienna, Austria). P values less than 0.05 (two-sided  
26  
27 test) were regarded as statistically significant.  
28  
29  
30

31 All the data were provided and analysed anonymously.  
32  
33  
34  
35  
36

## 37 **RESULTS**

### 38 **Response rates**

39  
40  
41  
42 Almost all prefectures and medical schools with eligible subjects participated in this study  
43  
44 (response rates 97.8-100%) (Table 1). The response rate is the percentage of those who returned a  
45  
46 completed questionnaire to the study office among all the prefectures or medical schools which have  
47  
48 eligible subjects.  
49  
50  
51  
52  
53  
54  
55  
56  
57  
58  
59  
60

1  
2  
3  
4  
5  
6 Table 1 here  
7  
8  
9  
10

### 11 **Passing rates of the National Physician License Examination**

12

13  
14 Throughout the study period, the passing rates of quota graduates with scholarship, quota  
15 graduates without scholarship, and non-quota with scholarship were higher than the passing rate of  
16  
17 all the other new medical graduates in Japan (Figure 2A-D). The percentage of quota with  
18  
19 scholarship was substantially higher than the percentage of all the other graduates in all the years  
20  
21 (97.9, 96.7, 97.4 and 94.7% v.s. 93.9, 94.5, 94.3 and 91.8%, respectively), and the difference was  
22  
23 statistically significant in all years except for 2015 ( $P=0.034, 0.090, 0.002, \text{ and } 0.003$ , respectively).  
24  
25  
26  
27  
28  
29  
30  
31 The passing rate of quota with scholarship was the highest among all the groups except for 2017 in  
32  
33 which the percentage of scholarship alone was the highest.  
34  
35  
36

37 The passing rate of quota with scholarship was still higher than that of the comparison group  
38  
39 except for 2017 even when the comparison group was limited to the graduates of public (i.e.,  
40  
41 national or prefectural) medical schools (93.6%, 94.8%, 95.3%, and 95.1% respectively). The  
42  
43 difference was however significant only in 2016 ( $p=0.16, 0.31, 0.02, \text{ and } 0.31$  respectively) (data not  
44  
45  
46  
47  
48 shown in the figure).  
49  
50  
51  
52  
53

54 Figure 2A-D here  
55  
56  
57  
58  
59  
60

### Retention rates for contractual work (non-buying-out rates)

Figure 3A-C shows the retention rates of subjects in quota with scholarship and those in non-quota with scholarship. Figure 3D shows the rates of all the graduates between 2014 and 2017. The retention rate varied by graduation year and at intervals after graduation. In all graduation years, the retention rate of quota with scholarship was higher than that of scholarship alone at the end of follow-up, but the difference was not statistically significant (Figure 3A-C). The survival analysis including all the subjects who obtained physician license between 2014 and 2017 showed that the retention rate 3.25 years after graduation was 92.2% for those in quota with scholarship and 89.9% for those with scholarship alone (statistically not significant: Figure 3D).

The 2014-2017 retention rate of quota with scholarship varied substantially among prefectures (78.4%-100%). The rate of scholarship alone likewise varied among prefectures (70.8%-100%) (data not shown in the figure).

Figure 3A-D here

## DISCUSSION

The results of this study showed that the graduates of regional quota with scholarship were

1  
2  
3  
4  
5  
6 more likely to pass the National License Examination for Physicians than the other new  
7  
8  
9 graduates of medical schools. The percentage of those who remained in the contractual  
10  
11 workforce accompanied with scholarship 3.25 years after graduation was 92.2% among those of  
12  
13 quota with scholarship, and 89.9% among those with scholarship alone.  
14  
15

16  
17 There has been a concern about the academic level of quota entrants because they are  
18  
19 admitted to medical school under different criteria.<sup>15</sup> The results of this study, however, show  
20  
21 that the concern is invalid at least for the observed period. In Japan the length of undergraduate  
22  
23 medical education is six years, which is long enough to obscure the correlation between  
24  
25 academic performance at entrance and that at graduation.<sup>22</sup> Also in the usual admission process,  
26  
27 many applicants are examined over the course of a few days, which forces medical schools to  
28  
29 choose entrants solely based on their test scores. Elements other than the written test score, such  
30  
31 as the personal statement and interview result, are not as valued. In contrast, the admission  
32  
33 process in many of the regional quotas is a combined evaluation of the applicant's high school  
34  
35 activities, a recommendation letter from the high school, an interview, an academic test, and a  
36  
37 personal statement. The variety of elements valued in the process may have contributed to a  
38  
39 better academic performance of quota students, and subsequently the better outcome on the  
40  
41 physician license examination. The results of this study thus offer a warning to Japan's  
42  
43 conventional medical school admission process. The government of Japan is scheduled to revise,  
44  
45  
46  
47  
48  
49  
50  
51  
52  
53  
54  
55  
56  
57  
58  
59  
60

1  
2  
3  
4  
5  
6 on a nationwide basis, the process of university entrance in 2021. This revision should make the  
7  
8 selection of medical school applicants more effective.  
9

10  
11 There is a room for argument whether the contract retention rates shown in this study are  
12  
13 high or low. The results shown are the overall value of all the subjects in all prefectures of Japan.  
14  
15 In reality, however, there is a substantial difference among prefectures. It is thus necessary to  
16  
17 evaluate the result in each prefecture or in each medical school. The retention rate of graduates  
18  
19 from Jichi Medical University, founded in 1972 solely to produce rural physicians and became  
20  
21 the model when making regional quota programmes all over the country, is 97%.<sup>23</sup> The  
22  
23 percentage is obviously higher than that of quota graduates shown in this study. However the  
24  
25 total amount of prefecture scholarship given to a Jichi student for six years is 23 million yen  
26  
27 (equivalent to USD 209,090), which is double the average amount of scholarship for a quota  
28  
29 student: 12.2 million yen (USD 110,909).<sup>13,24</sup> In order to make the quota programme sustainable,  
30  
31 we need to consider the balance between the financial burden of the country/prefecture and the  
32  
33 certainty to secure physicians in needed areas. Also the differences in the training offered to  
34  
35 students, in the focus of the school, and in postgraduate training programmes may have  
36  
37 contributed to the gap in retention rates between Jichi and quotas.  
38  
39  
40  
41  
42  
43  
44  
45  
46  
47  
48  
49

50  
51 Internationally there are many financial incentive programmes to recruit physicians to  
52  
53 practice in rural areas.<sup>25,26</sup> The estimated retention rate of the pooled subjects of these  
54  
55  
56  
57  
58  
59  
60

1  
2  
3  
4  
5  
6 programmes was reported to be 71%.<sup>26</sup> The retention rate of subjects in state scholarship  
7  
8 programmes for medical students in the United States was 66.5%.<sup>27</sup> While international data are  
9  
10 favourable, it is not known if the relationships would hold for Japan. Thus further study is  
11  
12 needed in Japan.  
13  
14  
15

16  
17 This study has the following limitations. First, as this study gathered information about  
18  
19 graduates, their academic performance and scholarship buy-out rate before graduation are  
20  
21 unknown. According to the Association of Japan Medical Colleges, the straight graduation rate,  
22  
23 which is the proportion of students who have finished their six-year medical program without  
24  
25 repeating a school year, of quota students who entered in 2008 was 89.6% nationwide, which was  
26  
27 higher than the rate of all the medical school entrants in the year (85.4%). The rate of quota entrants  
28  
29 in 2009, which was 89.0%, was also higher than that of all medical students (84.2%).<sup>13</sup> The report  
30  
31 also mentioned that 0.7% of undergraduate quota students bought out their prefectural  
32  
33 scholarship each year.<sup>13</sup> This information should be added to the results of this study when  
34  
35 assessing the effectiveness of quota and scholarship programmes. The geographic location of the  
36  
37 quota graduates and scholarship recipients are not shown in this study. Their location,  
38  
39 particularly after their contractual periods, is the most important outcome of these programs,  
40  
41 and will be assessed in the near future, based on the data from the ongoing cohort study.  
42  
43  
44  
45  
46  
47  
48  
49  
50  
51  
52

53  
54 Regional quotas and prefecture scholarships are based on temporary legislation by the  
55  
56  
57  
58  
59  
60

1  
2  
3  
4  
5  
6 national government, and thus the programmes will be revised starting in 2018. In most of the  
7  
8  
9 prefectures, however, the first generation of the quota entrants is still undergoing its clinical  
10  
11 training or have just started their practice in rural areas. So, as of this writing (summer 2017),  
12  
13  
14 we cannot assess the final outcomes of these programmes. All we can do is to collect  
15  
16  
17 intermediate outcomes like those shown in this study, analyse them in a variety of dimensions,  
18  
19  
20 and engage in evidence-based decision making for the future national policies while  
21  
22  
23 accumulating data for the next assessment.  
24  
25  
26  
27

## 28 **CONCLUSION**

29  
30  
31 The passing rate of the entrants to the *chiikiwaku*, regional quota of entrants to medical schools,  
32  
33  
34 for the National License Examination for Physicians was higher than the rate of non-quota medical  
35  
36  
37 graduates. The passing rate of prefecture scholarship recipients was also higher than non-recipients.  
38  
39  
40 More than 90% of quota physicians with scholarship were complying with the terms of their contract  
41  
42  
43 for more than three years after obtaining the physician license during which we observed. The  
44  
45  
46 imminent revision of the national policy regarding the quota and scholarship programmes should be  
47  
48  
49 based on these intermediate outcomes.  
50  
51  
52  
53

## 54 **Contributors**

55  
56  
57  
58  
59  
60



1  
2  
3  
4  
5  
6 MM contributed to the study design, tools, study administration, data collection, analysis,  
7  
8 interpretation of data, and writing the draft. KT and TM contributed to the study design, tools, study  
9  
10 administration, data interpretation, and writing the draft. ST and KI contributed to the study design,  
11  
12 interpretation of data, and writing the draft. SK contributed to the analysis and writing the draft, TO  
13  
14 and SI contributed to the study administration, data collection.  
15  
16  
17  
18

### 19 20 **Funding**

21  
22 This study is funded by the Ministry of Education, Culture, Sports, Science and Technology  
23  
24 KAKENHI Grant-in-Aid for Scientific Research (C), Grant Number (25460803).  
25  
26  
27

### 28 29 **Competing interests**

30  
31 None  
32  
33

### 34 35 **Ethics approval**

36  
37 Ethical approval was granted by the Ethics Committee for epidemiological research of  
38  
39 Hiroshima University (ref. no. 778) and the Research Ethics Committee of Nagasaki University  
40  
41 Graduate School of Biomedical Sciences (ref. no. 13091342).  
42  
43  
44

### 45 46 **Data sharing statement**

47  
48 Conditions of the ethical approvals permit the cohort office (Department of Community-Based  
49  
50 Medical System, Graduate School of Biomedical and Health Sciences, Hiroshima University) and  
51  
52 the sub-office (Department of Community Medicine, Nagasaki University Graduate School of  
53  
54  
55  
56  
57  
58  
59  
60

Biomedical Science) to share the aggregated data with stakeholders or researchers.

## REFERENCES

1. Matsumoto M, Inoue K, Kajii E, Takeuchi K. Retention of physicians in rural Japan: concerted efforts of the government, prefectures, municipalities and medical schools. *Rural Remote Health*. 2010;10:1432.
2. Matsumoto M, Takeuchi K, Yokobayashi K, Tazuma S. Geographic maldistribution of physicians in Japan : increasing the number of generalists is one solution. *J Gen Fam Med* 2015;16:1-5.
3. Inoue K, Matsumoto M, Toyokawa S, Kobayashi Y. Transition of physician distribution (1980-2002) in Japan and factors predicting future rural practice. *Rural Remote Health*. 2009;9:1070.
4. Toyabe S. Trend in geographic distribution of physicians in Japan. *Int J Equity Health*. 2009;8:5.
5. Tanihara S, Kobayashi Y, Une H, Kawachi I. Urbanization and physician maldistribution: a longitudinal study in Japan. *BMC Health Serv Res*. 2011;11:260.
6. Kobayashi Y, Takaki H. Geographic distribution of physicians in Japan. *Lancet*. 1992;340:1391-3.
7. Matsumoto M, Inoue K, Bowman R, Noguchi S, Toyokawa S, Kajii E. Geographical distributions of physicians in Japan and US: Impact of healthcare system on physician dispersal pattern. *Health Policy* 2010;96:255-61.
8. Hara K, Otsubo T, Kunisawa S, Imanaka Y. Examining sufficiency and equity in the geographic distribution of physicians in Japan: a longitudinal study. *BMJ Open*. 2017;7:e013922.
9. Iwata K, Mosby DJ, Sakane M. Board certification in Japan: corruption and near-collapse of reform. *Postgrad Med J*. 2017;93:436.
10. Japan Association of City Mayors. Kokumin-fuzai no shinsenmoni-seido wo kigushi sessoku ni susumeru kotoni hantaisuru kinkyu youbou (Objecting the new programs for producing specialist doctors.). 2017.  
[http://www.mayors.or.jp/p\\_opinion/documents/290412shinsenmoni\\_kinkyuyoubou.pdf](http://www.mayors.or.jp/p_opinion/documents/290412shinsenmoni_kinkyuyoubou.pdf). (Accessed April 25, 2017).

- 1  
2  
3  
4  
5 **11.** Ministry of Health, Labour and Welfare. Shakai-hosyou-shingikai iryoubukai dai46kai  
6 gijiroku (Discussion record of the 46th meical group meeting of the Social Security  
7 Committee). 2016.  
8 [http://www.mhlw.go.jp/file/05-Shingikai-12601000-Seisakutoukatsukan-Sanjikanshitsu\\_Sha](http://www.mhlw.go.jp/file/05-Shingikai-12601000-Seisakutoukatsukan-Sanjikanshitsu_Sha)  
9 [kaihoshoutantou/gijiroku46.pdf](http://www.mhlw.go.jp/file/05-Shingikai-12601000-Seisakutoukatsukan-Sanjikanshitsu_Sha). (Accessed April 25, 2017).
- 10  
11  
12 **12.** Ministry of Health Labour and Welfare. Shakai-hosyou-shingikai iryoubukai dai47kai  
13 gijiroku (Discussion record of the 47th meical group meeting of the Social Security  
14 Committee). 2016. <http://www.mhlw.go.jp/stf/shingi2/0000149697.html>. (Accessed April 25,  
15 2017)
- 16  
17  
18 **13.** Association of Japan Medical Colleges. *Heisei 28 nendo chiikiwaku-nyugaku-seido to*  
19 *chiiki-iryo-shien-senta no jitsujou ni kansuru chousahoukoku (Survey report on regional*  
20 *subquota admission and community health support centers in 2016.)* Tokyo: AJMC;2017.
- 21  
22 **14.** Matsumoto M, Inoue K, Takeuchi K. Quality of care in Japan: an additional strategy. *Lancet*.  
23 2011;378:e17.
- 24  
25 **15.** Matsumoto M, Takeuchi K, Tanaka J, et al. Follow-up study of the regional quota system of  
26 Japanese medical schools and prefecture scholarship programmes: a study protocol. *BMJ*  
27 *Open*. 2016;6:e011165.
- 28  
29 **16.** Matsumoto M, Mizooka M, Tazuma S. General practice departments of university hospitals  
30 and certified training programs for general practitioners in Japan: a nationwide  
31 questionnaire survey. *J Gen Fam Med*. 2017; 00: 1-5.
- 32  
33 **17.** Ministry of Education, Culture, Sports, Science and Technology. Heisei28nendo igakubu  
34 nyugakuteiinanzou ni tuite (Increase in the number of entrants to medical schools in 2016).  
35 2016.  
36 [http://www.mext.go.jp/b\\_menu/houdou/27/10/\\_\\_\\_icsFiles/afieldfile/2015/10/23](http://www.mext.go.jp/b_menu/houdou/27/10/___icsFiles/afieldfile/2015/10/23)  
37 [/1363060\\_4\\_1.pdf](http://www.mext.go.jp/b_menu/houdou/27/10/___icsFiles/afieldfile/2015/10/23). (Accessed June 22, 2016).
- 38  
39 **18.** Sapix Yozemi Group. 2016-nendo kokukouritsudaigaku-nyushi joukyou to bunseki (Results  
40 and analysis of public medical school admission in 2016). 2016.  
41 <http://juken.y-sapix.com/articles/3640.html>. (Accessed August 19, 2017).
- 42  
43 **19.** Sapix Yozemi Group. 2016-nendo shiritsudaigaku-nyushi joukyou to bunseki (Results and  
44 analysis of private medical school admission in 2016). 2016.  
45 <http://juken.y-sapix.com/articles/3668.html>. (Accessed August 19, 2017).
- 46  
47  
48 **20.** Ministry of Health, Labour and Welfare. Kokka-shiken-gokaku-happyou (Results of the  
49 national license examinations). 2017.  
50 [http://www.mhlw.go.jp/kouseiroudoushou/shikaku\\_shiken/goukaku.html](http://www.mhlw.go.jp/kouseiroudoushou/shikaku_shiken/goukaku.html).  
51 (Accessed August 15, 2017)
- 52  
53  
54 **21.** TECOM Inc. Kokkashiken-jouhou dai 108-111 kai (Information on the 108th-111th national  
55  
56  
57  
58  
59  
60

- licese examinations). 2017. <https://www2.tecomgroup.jp/igaku/topics/kokushi/>. (Accessed August 15, 2017).
22. Sakemi T. Heisei 14-15nendo igakubu-igakuka-nyugakusya no nyugakugo-seiseki ni kansuru bunseki (Academic performance of medical students after admission). *Daigakukyōiku Nenpo*. 2010;6:1-13.
23. Matsumoto M, Kajii E. Medical education program with obligatory rural service: analysis of factors associated with obligation compliance. *Health Policy* 2009;90(2-3):125-32.
24. Jichi Medical University. Syugaku-shikin, shogakushikin (Scholarship system). 2017. <https://www.jichi.ac.jp/exam/medicine/campus/backup.html>. (Accessed August 15, 2017).
25. Frehywot S, Mullan F, Payne PW, Ross H. Compulsory service programmes for recruiting health workers in remote and rural areas: do they work? *Bull World Health Org*. 2010;88:364-70.
26. Barnighausen T, Bloom DE. Financial incentives for return of service in underserved areas: a systematic review. *BMC health serv res*. 2009;9:86.
27. Pathman DE, Konrad TR, King TS, Taylor DH, Jr., Koch GG. Outcomes of states' scholarship, loan repayment, and related programs for physicians. *Med Care*. 2004;42:560-8.

**Table 1. Response rates of prefectures and medical schools**

Table 1. Response rates of prefectures and medical schools

| Year | Prefectures |               |                        |                   | Medical Schools |               |             |
|------|-------------|---------------|------------------------|-------------------|-----------------|---------------|-------------|
|      | N*          | Response rate | Subjects               |                   | N*              | Response rate | Subjects    |
|      |             |               | Quota with scholarship | Scholarship alone |                 |               | Quota alone |
| 2014 | 36/36       | 100%          | 144                    | 322               | 19/19           | 100%          | 166         |
| 2015 | 45/46       | 97.8%         | 305                    | 391               | 22/22           | 100%          | 253         |
| 2016 | 46/47       | 97.8%         | 498                    | 340               | 29/29           | 100%          | 308         |
| 2017 | 47/47       | 100%          | 609                    | 376               | 31/31           | 100%          | 382         |

\*Both the number of eligible prefectures (medical schools) and that of responded prefectures (medical schools) are shown.

### Figure legends

1  
2  
3  
4  
5  
6  
7  
8  
9  
10  
11  
12  
13  
14  
15  
16  
17  
18  
19  
20  
21  
22  
23  
24  
25  
26  
27  
28  
29  
30  
31  
32  
33  
34  
35  
36  
37  
38  
39  
40  
41  
42  
43  
44  
45  
46  
47  
48  
49  
50  
51  
52  
53  
54  
55  
56  
57  
58  
59  
60

Figure 1. Study subjects and data collection.

Figure 1 footnote. “Quota with scholarship” are students who entered a regional quota and received a prefecture scholarship, “quota alone” are students who entered the quota but did not receive the scholarship, “scholarship alone” are students who received the scholarship but did not enter the quota, and others are all medical students excluding quota and scholarship ones.

Figure 2. Passing rates of the National Licence Examination for Physicians (A: 2014, B: 2015, C: 2016, D: 2017).

Figure 2 footnote. Control data were from the Ministry of Health, Labour and Welfare.<sup>20,21</sup> Rates in 2014 and 2015 have been reported previously.<sup>15</sup> \*Fisher’s exact test.

Figure 3. Retention rates of subjects in quota with scholarship and those in non-quota with scholarship (scholarship alone). (A: graduates in 2014, B: 2015, C: 2016, D: 2014-2017)

1  
2  
3  
4  
5  
6  
7  
8  
9  
10  
11  
12  
13  
14  
15  
16  
17  
18  
19  
20  
21  
22  
23  
24  
25  
26  
27  
28  
29  
30  
31  
32  
33  
34  
35  
36  
37  
38  
39  
40  
41  
42  
43  
44  
45  
46  
47  
48  
49  
50  
51  
52  
53  
54  
55  
56  
57  
58  
59  
60

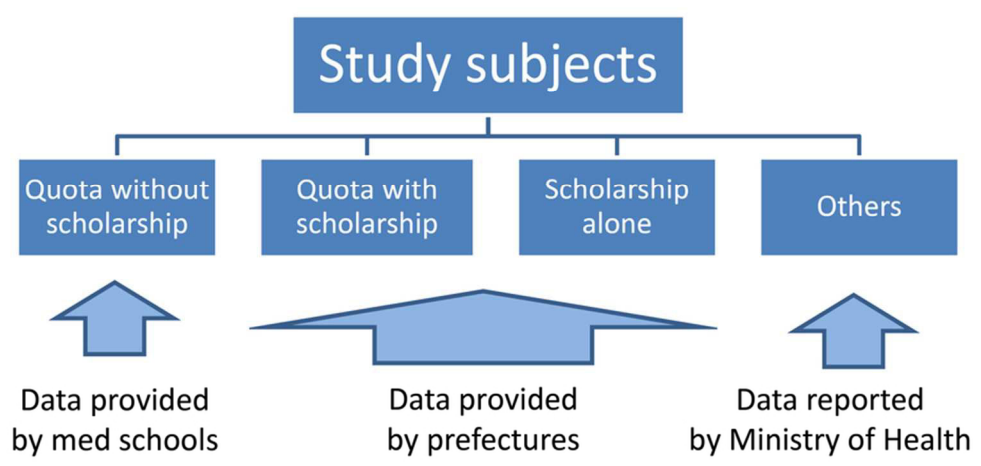

Figure 1

80x37mm (300 x 300 DPI)

er review only

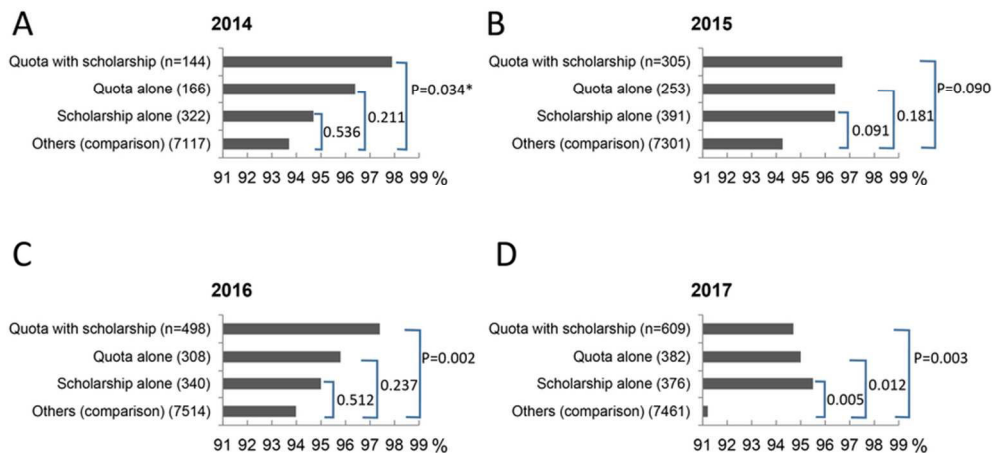

Figure 2

80x37mm (300 x 300 DPI)

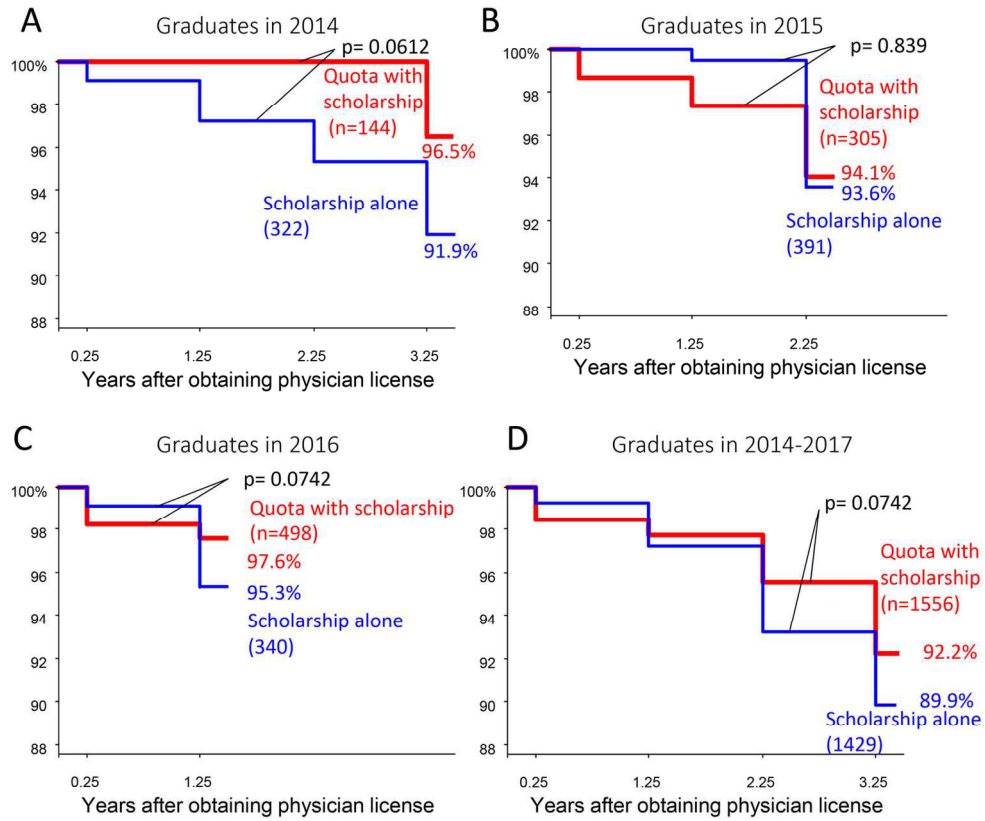

Figure 3

140x116mm (300 x 300 DPI)



**STROBE 2007 (v4) Statement—Checklist of items that should be included in reports of *cross-sectional studies***

| Section/Topic                | Item # | Recommendation                                                                                                                                                                       | Reported on page #                             |
|------------------------------|--------|--------------------------------------------------------------------------------------------------------------------------------------------------------------------------------------|------------------------------------------------|
| Title and abstract           | 1      | (a) Indicate the study's design with a commonly used term in the title or the abstract                                                                                               | 2                                              |
|                              |        | (b) Provide in the abstract an informative and balanced summary of what was done and what was found                                                                                  | 2-3                                            |
| <b>Introduction</b>          |        |                                                                                                                                                                                      |                                                |
| Background/rationale         | 2      | Explain the scientific background and rationale for the investigation being reported                                                                                                 | 5-8                                            |
| Objectives                   | 3      | State specific objectives, including any prespecified hypotheses                                                                                                                     | 8                                              |
| <b>Methods</b>               |        |                                                                                                                                                                                      |                                                |
| Study design                 | 4      | Present key elements of study design early in the paper                                                                                                                              | 8-9                                            |
| Setting                      | 5      | Describe the setting, locations, and relevant dates, including periods of recruitment, exposure, follow-up, and data collection                                                      | 8-9                                            |
| Participants                 | 6      | (a) Give the eligibility criteria, and the sources and methods of selection of participants                                                                                          | 9-10                                           |
| Variables                    | 7      | Clearly define all outcomes, exposures, predictors, potential confounders, and effect modifiers. Give diagnostic criteria, if applicable                                             | 9-10                                           |
| Data sources/<br>measurement | 8*     | For each variable of interest, give sources of data and details of methods of assessment (measurement). Describe comparability of assessment methods if there is more than one group | 9-11                                           |
| Bias                         | 9      | Describe any efforts to address potential sources of bias                                                                                                                            | 8-9                                            |
| Study size                   | 10     | Explain how the study size was arrived at                                                                                                                                            | Not needed. This study is a nationwide census. |
| Quantitative variables       | 11     | Explain how quantitative variables were handled in the analyses. If applicable, describe which groupings were chosen and why                                                         | 10-11                                          |
| Statistical methods          | 12     | (a) Describe all statistical methods, including those used to control for confounding                                                                                                | 10-11                                          |
|                              |        | (b) Describe any methods used to examine subgroups and interactions                                                                                                                  | Not applicable                                 |
|                              |        | (c) Explain how missing data were addressed                                                                                                                                          | 11                                             |
|                              |        | (d) If applicable, describe analytical methods taking account of sampling strategy                                                                                                   | 11                                             |

|                          |     |                                                                                                                                                                                                              |                                  |
|--------------------------|-----|--------------------------------------------------------------------------------------------------------------------------------------------------------------------------------------------------------------|----------------------------------|
|                          |     | (e) Describe any sensitivity analyses                                                                                                                                                                        | Not needed.                      |
| <b>Results</b>           |     |                                                                                                                                                                                                              |                                  |
| Participants             | 13* | (a) Report numbers of individuals at each stage of study—eg numbers potentially eligible, examined for eligibility, confirmed eligible, included in the study, completing follow-up, and analysed            | 11                               |
|                          |     | (b) Give reasons for non-participation at each stage                                                                                                                                                         | 11                               |
|                          |     | (c) Consider use of a flow diagram                                                                                                                                                                           | 9                                |
| Descriptive data         | 14* | (a) Give characteristics of study participants (eg demographic, clinical, social) and information on exposures and potential confounders                                                                     | No data                          |
|                          |     | (b) Indicate number of participants with missing data for each variable of interest                                                                                                                          | 11 (no data on missing subjects) |
| Outcome data             | 15* | Report numbers of outcome events or summary measures                                                                                                                                                         | 11-13                            |
| Main results             | 16  | (a) Give unadjusted estimates and, if applicable, confounder-adjusted estimates and their precision (eg, 95% confidence interval). Make clear which confounders were adjusted for and why they were included | 11-13                            |
|                          |     | (b) Report category boundaries when continuous variables were categorized                                                                                                                                    | 11-13                            |
|                          |     | (c) If relevant, consider translating estimates of relative risk into absolute risk for a meaningful time period                                                                                             | Not relevant                     |
| Other analyses           | 17  | Report other analyses done—eg analyses of subgroups and interactions, and sensitivity analyses                                                                                                               | Not applicable                   |
| <b>Discussion</b>        |     |                                                                                                                                                                                                              |                                  |
| Key results              | 18  | Summarise key results with reference to study objectives                                                                                                                                                     | 13                               |
| Limitations              | 19  | Discuss limitations of the study, taking into account sources of potential bias or imprecision. Discuss both direction and magnitude of any potential bias                                                   | 15-16                            |
| Interpretation           | 20  | Give a cautious overall interpretation of results considering objectives, limitations, multiplicity of analyses, results from similar studies, and other relevant evidence                                   | 13-16                            |
| Generalisability         | 21  | Discuss the generalisability (external validity) of the study results                                                                                                                                        | 15                               |
| <b>Other information</b> |     |                                                                                                                                                                                                              |                                  |
| Funding                  | 22  | Give the source of funding and the role of the funders for the present study and, if applicable, for the original study on which the present article is based                                                | 17                               |

\*Give information separately for cases and controls in case-control studies and, if applicable, for exposed and unexposed groups in cohort and cross-sectional studies.

1  
2  
3  
4 **Note:** An Explanation and Elaboration article discusses each checklist item and gives methodological background and published examples of transparent reporting. The STROBE  
5 checklist is best used in conjunction with this article (freely available on the Web sites of PLoS Medicine at <http://www.plosmedicine.org/>, Annals of Internal Medicine at  
6 <http://www.annals.org/>, and Epidemiology at <http://www.epidem.com/>). Information on the STROBE Initiative is available at [www.strobe-statement.org](http://www.strobe-statement.org).  
7  
8  
9  
10  
11  
12  
13  
14  
15  
16  
17  
18  
19  
20  
21  
22  
23  
24  
25  
26  
27  
28  
29  
30  
31  
32  
33  
34  
35  
36  
37  
38  
39  
40  
41  
42  
43  
44  
45  
46  
47

For peer review only

# BMJ Open

## Results of physician license examination and scholarship contract compliance by the graduates of regional quotas in Japanese medical schools: a nationwide cross-sectional survey

|                                 |                                                                                                                                                                                                                                                                                                                                                                                                                                                                                                                                                                                                                                                                                                             |
|---------------------------------|-------------------------------------------------------------------------------------------------------------------------------------------------------------------------------------------------------------------------------------------------------------------------------------------------------------------------------------------------------------------------------------------------------------------------------------------------------------------------------------------------------------------------------------------------------------------------------------------------------------------------------------------------------------------------------------------------------------|
| Journal:                        | <i>BMJ Open</i>                                                                                                                                                                                                                                                                                                                                                                                                                                                                                                                                                                                                                                                                                             |
| Manuscript ID                   | bmjopen-2017-019418.R2                                                                                                                                                                                                                                                                                                                                                                                                                                                                                                                                                                                                                                                                                      |
| Article Type:                   | Research                                                                                                                                                                                                                                                                                                                                                                                                                                                                                                                                                                                                                                                                                                    |
| Date Submitted by the Author:   | 23-Nov-2017                                                                                                                                                                                                                                                                                                                                                                                                                                                                                                                                                                                                                                                                                                 |
| Complete List of Authors:       | Matsumoto, Masatoshi; Hiroshima Daigaku, Community-based Medical System<br>Takeuchi, keisuke<br>Owaki, Tetsuhiro; Graduate School of Medical Sciences, Kagoshima University, Education Center for Doctors in Remote Islands and Rural Areas<br>Iguchi, Seitaro; Niigata University Graduate School of Medical & Dental Sciences, Department of Community Medicine<br>Inoue, Kazuo; Chiba Medical Center, Teikyo University School of Medicine, Department of Community Medicine<br>Kashima, Saori; Hiroshima Daigaku, Public Health and Health Policy<br>Tazuma, Susumu; Hiroshima University Hospital, General Internal Medicine<br>Maeda, Takahiro; Nagasaki University, Department of Community Medicine |
| <b>Primary Subject Heading</b>: | Health policy                                                                                                                                                                                                                                                                                                                                                                                                                                                                                                                                                                                                                                                                                               |
| Secondary Subject Heading:      | Health policy, Medical education and training                                                                                                                                                                                                                                                                                                                                                                                                                                                                                                                                                                                                                                                               |
| Keywords:                       | physician, geography, MEDICAL EDUCATION & TRAINING, Health policy < HEALTH SERVICES ADMINISTRATION & MANAGEMENT, Japan                                                                                                                                                                                                                                                                                                                                                                                                                                                                                                                                                                                      |
|                                 |                                                                                                                                                                                                                                                                                                                                                                                                                                                                                                                                                                                                                                                                                                             |

SCHOLARONE™  
Manuscripts

1  
2  
3  
4  
5 Results of physician license examination and scholarship contract compliance by the graduates of  
6 regional quotas in Japanese medical schools: a nationwide cross-sectional survey  
7

8  
9 Masatoshi Matsumoto<sup>1</sup>, Keisuke Takeuchi<sup>1</sup>, Tetsuhiro Owaki<sup>2</sup>, Seitaro Iguchi<sup>3</sup>, Kazuo Inoue<sup>4</sup>, Saori  
10 Kashima<sup>5</sup>, Susumu Tazuma<sup>6</sup>, Takahiro Maeda<sup>7</sup>  
11

12  
13 1. Department of Community-Based Medical System, Institute of Biomedical and Health Sciences,  
14 Hiroshima University, Hiroshima, Japan  
15

16 2. Education Center for Doctors in Remote Islands and Rural Areas, Graduate School of Medical  
17 Sciences, Kagoshima University, Kagoshima, Japan  
18

19 3. Department of Community Medicine, Niigata University Graduate School of Medical & Dental  
20 Sciences, Niigata, Japan  
21

22 4. Department of Community Medicine, Chiba Medical Center, Teikyo University School of  
23 Medicine, Chiba, Japan  
24

25 5. Department of Public Health and Health Policy, Graduate School of Biomedical and Health  
26 Sciences, Hiroshima University, Hiroshima, Japan  
27

28 6. Department of General Internal Medicine, Hiroshima University Hospital and Graduate School of  
29 Biomedical & Health Sciences, Hiroshima, Japan  
30

31 7. Department of Community Medicine, Nagasaki University Graduate School of Biomedical  
32 Science, Nagasaki, Japan  
33

34  
35 Corresponding author: Masatoshi Matsumoto

36 Department of Community Based Medical System, Institute of Biomedical and Health Sciences,  
37 Hiroshima University  
38

39 1-2-3 Kasumi, Minami-ku, Hiroshima, 734-8551 JAPAN

40 Phone: +81-82-257-5894 Fax: +81-82 257-5895 Email: matmo10@jb3.so-net.ne.jp  
41  
42

43 Keywords: physicians; geography; medical education; health policy; Japan  
44

45  
46 Word count: 2856  
47  
48  
49  
50  
51  
52  
53  
54  
55  
56  
57  
58  
59  
60

## ABSTRACT

### Objectives:

Responding to the serious shortage of physicians in rural areas, the Japanese government has aggressively increased the number of entrants to medical schools since 2008, mostly as a *chiikiwaku*, entrants filling a regional quota. The quota has spread to most medical schools, and these entrants occupied 16% of all medical school seats in 2016. Most of these entrants were admitted to medical school with a scholarship with the understanding that after graduation they will practice in designated areas of their home prefectures for several years. The quota and scholarship programmes will be revised by the government starting in 2018. This study evaluates the intermediate outcomes of these programmes.

**Design:** Cross-sectional survey to all prefectural governments and medical schools every year from 2014 to 2017 to obtain data on medical graduates.

**Settings:** Nationwide

**Participants:** All quota and non-quota graduates with prefecture scholarship in each prefecture, and all the quota graduates without scholarship in each medical school.

**Primary outcome measures:** Passing rate of the National License Examination for Physicians, and the percentage of graduates who have not bought out the scholarship contract after graduation.

**Results:** Most Japan's prefectures and medical schools participated in this study (97.8%-100%).

1  
2  
3  
4  
5  
6 Quota graduates with scholarship were significantly more likely to pass the National License  
7  
8 Examination than the other medical graduates in Japan at all the years (97.9, 96.7, 97.4 and 94.7%  
9  
10 versus 93.9, 94.5, 94.3 and 91.8%, respectively). The percentage of quota graduates with scholarship  
11  
12 who remained in the scholarship contract 3 years after graduation was 92.2%, and 89.9% for  
13  
14 non-quota graduates with scholarship.  
15  
16  
17  
18  
19

20 **Conclusions:** Quota entrants showed better academic performance than their peers. Most of the  
21  
22 quota graduates remained in the contractual workforce. The imminent revision of the national policy  
23  
24 regarding quota and scholarship programmes need to be based on this evidence.  
25  
26  
27  
28  
29  
30  
31  
32  
33  
34  
35  
36  
37  
38  
39  
40  
41  
42  
43  
44  
45  
46  
47  
48  
49  
50  
51  
52  
53  
54  
55  
56  
57  
58  
59  
60

### Strengths and limitations of this study

- This study shows intermediate outcomes of quota admission programmes of medical schools and prefecture scholarship programmes, one of the largest national policies enacted to improve Japan's geographic maldistribution of physicians.
- With support from concerned ministries and the representative body of medical schools, almost all of Japan's prefectural governments and medical schools participated in this study, which enabled the collection of reliable information on study subjects every year.
- The passing rates of the National License Examination for Physicians of the quota graduates with scholarship, quota graduates without scholarship, and non-quota graduates with scholarship were compared with that of the other medical graduates in Japan.
- The percentages of quota and non-quota graduates with scholarship who have not bought out the scholarship contract were calculated and compared with each other.
- The geographic location of the quota graduates and scholarship recipients are not shown in this study, which will be assessed in the ongoing cohort study of which this study is a part.

## INTRODUCTION



## Geographic distribution of physicians in Japan

The geographic inequity of physician distribution has long been a social problem in Japan and in many other countries. Japan's national and local governments have attempted to solve this problem by establishing public hospitals and clinics in rural areas since 1950s, creating at least one medical school in each prefecture in 1960s and 1970s, including Jichi Medical University in 1972 which is exclusively responsible for producing rural physicians.<sup>1,2</sup>

Over the long term, these policies have increased the number of physicians in rural areas,<sup>3</sup> but many studies revealed that the disparity in proportional representation of urban and rural physicians has persisted.<sup>3-8</sup> This maldistribution of physicians has worsened since 2004 when the new residency training programme for the physicians within the first two years after graduation was introduced nationwide.<sup>4,8</sup> Furthermore, additional specialty training for physicians after residency training, scheduled to start in 2018, has caused concern among health care professionals and policy makers that young physicians will be even more likely to cluster in large cities.<sup>9-12</sup>

## *Chiikiwaku* (regional quota) and prefecture scholarship as a national policy

In response to such a situation, the national government has aggressively increased the number of entrants to medical schools since 2008. Most of these entrants were admitted as a *chiikiwaku*, a regional quota of a medical school. The model of these quotas was Jichi Medical University. The

1  
2  
3  
4  
5  
6 quota had spread to 67 of the 80 medical schools by the end of 2016.<sup>13</sup> The quota is a special  
7  
8 admission quota of a medical school in which entrants were admitted under the condition that they  
9  
10 practice in designated areas of their home prefectures, usually in rural areas in exchange for a  
11  
12 scholarship by the prefectural government.<sup>14</sup> The scholarship is given for the all six years of  
13  
14 undergraduate medical education, and the graduate is required to work in the prefecture for nine  
15  
16 years after graduation including four years in rural areas of the prefecture. The prefecture  
17  
18 governments allocate a budget for the scholarship according to the national policy. Some medical  
19  
20 schools have a regional quota without the scholarship. Entrants under this form of quota thus are  
21  
22 not contractually required to work in designated areas though they are expected to do so.<sup>15</sup> The  
23  
24 number of entrants to any form of regional quota is now 1504, accounting for 16% of all medical  
25  
26 school students in Japan.<sup>16,17</sup>  
27  
28  
29  
30  
31  
32  
33  
34  
35

36  
37 Apart from the scholarship coupled with the quota admission, there are scholarship programmes  
38  
39 of prefectural governments for non-*chiikiwaku* students. These scholarships are also based in the  
40  
41 national policy. The scholarship is given to a medical student who has been admitted to a medical  
42  
43 school through a conventional admission process and then applies to the scholarship programme.  
44  
45  
46 The recipients of these scholarships are also required to work in the designated areas of the  
47  
48 prefecture for a certain amount of time, usually 1.5 times the length of the term of the scholarship.  
49  
50  
51  
52  
53  
54 Half of that contractual period is to be spent practicing in rural areas of the prefecture.<sup>15</sup>  
55  
56  
57  
58  
59  
60

### Academic performance and compliance of scholarship contract

Admission to medical schools in Japan has been highly competitive. In 2016, one in four applicants of public medical schools and one in 16 applicants of private medical schools were accepted.<sup>18,19</sup> Medical schools have not traditionally imposed restrictions on the geographic background of applicants, so each medical school, even rural ones, attracts applicants from all over Japan. Most the medical schools require a few days of written tests coupled with a short interview of all the applicants, so given the lack of time for interviews, admission decisions are largely based on scores of written test.

Entrance examination for regional quota is different. Most medical schools admit students only from the prefecture in which the students live and/or from which the scholarship is given. In addition, many medical schools consider only applicants who have been recommended by their high schools. Thus there are far fewer applicants to the quotas. The application process for quota applicants is usually a combination of written test, academic records in the high school, a personal statement, and an interview. The academic test thus carries less weight as compared with the conventional admission process. Because of these differences, the general population and medical educators are concerned about the academic performance of quota entrants. In addition, there is a concern that many quota entrants may buy out their contract to avoid practising in the prefecture and/or in rural

1  
2  
3  
4  
5  
6 areas.<sup>15</sup> However, so far, no researchers seem to have compared the academic and contractual  
7  
8  
9 outcomes of quota and non-quota students in Japan.

### 10 11 12 13 14 **Objectives of this study**

15  
16  
17 In this study we compared the results of the National License Examination for Physicians among  
18  
19  
20 graduates of quota with scholarship, quota without scholarship, non-quota with scholarship and all  
21  
22  
23 the other new medical graduates in Japan. We also examined the percentages of those graduates who  
24  
25  
26 have not bought out the scholarship. We assessed the intermediate outcomes of quota and  
27  
28  
29 scholarship programmes, so that the results can be used to inform political decision-makers for  
30  
31  
32 future revision of the quota and scholarship programs.

## 33 34 35 36 **METHODS**

### 37 38 39 **Design and settings**

40  
41  
42 This study is a part of the nationwide cohort study conducted by the Japanese Council for  
43  
44  
45 Community-based Medical Education (JCCME).<sup>15</sup> Yearly cross-sectional outcomes of the cohort  
46  
47  
48 study are reported in this study. The study period is from 2014 to 2017. The study includes three  
49  
50  
51 groups of subjects: quota graduates with scholarship, non-quota graduates with scholarship  
52  
53  
54 (scholarship alone), and quota graduates without scholarship (quota alone). Data on the former two  
55  
56  
57  
58  
59  
60

1  
2  
3  
4  
5  
6 groups were collected from prefectures and that on the last group were collected from medical  
7  
8 schools (Figure 1).  
9

10  
11  
12  
13  
14 Figure 1 here  
15

16  
17  
18  
19  
20 Every November, the cohort study office of JCCME sent a pre-survey questionnaire to all the 47  
21  
22 prefectures and all the 77 medical schools except for Jichi Medical University, National Defence  
23  
24 Medical College, and University of Occupational and Environmental Health to ask which  
25  
26 prefectures and medical schools have eligible subjects. Every year all the prefectures and medical  
27  
28 schools responded to this. In June of the survey year, the study office sends a survey questionnaire to  
29  
30 each prefectural government to obtain information on the number of new graduates who had  
31  
32 received scholarship, the number who passed the National License Examination for Physicians, and  
33  
34 the number who have bought out the scholarship. The cohort office sends a questionnaire to each  
35  
36 medical school to obtain information on the number of quota students without scholarship and  
37  
38 number who passed the National License Examination for Physicians. The Ministry of Health,  
39  
40 Labour and Welfare, the Ministry of Education Culture, Sports, Science and Technology, and the  
41  
42 Association of Japan Medical Colleges supported this study by requesting prefectures and/or medical  
43  
44 schools to participate.  
45  
46  
47  
48  
49  
50  
51  
52  
53  
54  
55  
56  
57  
58  
59  
60

### Definitions of quota and scholarship

In this study, a quota student is one whose “geographic background or location of graduated high schools of applicants are restricted and/or working place or specialty after graduation is clearly specified.” A scholarship is “given by a prefecture to a medical student which needs not to be paid back if the student works in designated areas by the prefecture for a certain period.”

### Statistical analyses

Based on the data obtained from the prefectures and medical schools, passing rates of the National License Examination for Physicians were calculated for the subjects in quota with scholarship, quota without scholarship (quota alone), and non-quota with scholarship (scholarship alone). The rates in 2014 and 2015 have been reported previously,<sup>15</sup> and in this study, results in 2016 and 2017 were added. These rates were compared with the passing rate of all the other medical graduates in Japan. The passing rate of the other graduates was calculated by subtracting the numbers of passed and failed subjects in quota with scholarship, quota alone and scholarship alone from those of all new graduates in Japan reported every year by the Ministry of Health, Labour and Welfare.<sup>20,21</sup> The comparisons were conducted with the Fisher’s exact test for a part of 2014 analysis because there were fewer than 5 failed subjects in quota with scholarship. All the other comparisons

1  
2  
3  
4  
5  
6 were conducted with the chi-square test of independence.  
7

8  
9 Also based on the data from the prefectures, retention rates for contractual workforce of subjects  
10  
11 in quota with scholarship and subjects with scholarship alone were calculated. The retention rate is  
12  
13 the percentage of graduates who are complying with the terms of being admitted to a quota and/or  
14  
15 receiving scholarship. The retention rate of each group was calculated in each cohort of graduation  
16  
17 year. The retention rate of all those who graduated between 2014 and 2017 was also calculated with  
18  
19 Kaplan-Meier survival analysis in which subjects with various observation periods were analysed.  
20  
21 The retention rates were compared between the two groups with the log-rank test.  
22  
23  
24  
25  
26  
27

28  
29 Statistical analyses were done using SPSS version 24 (IBM-SPSS Japan, Tokyo) and R version  
30  
31 3.3.2 (R Foundation for Statistical Computing, Vienna, Austria). P values less than 0.05 (two-sided  
32  
33 test) were regarded as statistically significant.  
34  
35  
36

37 All the data were provided and analysed anonymously.  
38  
39  
40  
41

## 42 **RESULTS**

### 43 **Response rates**

44  
45  
46  
47  
48 Almost all prefectures and medical schools with eligible subjects participated in this study  
49  
50 (response rates 97.8-100%) (Table 1). The response rate is the percentage of those who returned a  
51  
52 completed questionnaire to the study office among all the prefectures or medical schools which have  
53  
54  
55  
56  
57  
58  
59  
60

1  
2  
3  
4  
5  
6 eligible subjects.  
7  
8  
9

10  
11 Table 1 here  
12  
13  
14  
15

### 16 17 **Passing rates of the National Physician License Examination** 18

19  
20 Throughout the study period, the passing rates of quota graduates with scholarship, quota  
21 graduates without scholarship, and non-quota with scholarship were higher than the passing rate of  
22 all the other new medical graduates in Japan (Figure 2A-D). The percentage of quota with  
23 scholarship was substantially higher than the percentage of all the other graduates in all the years  
24 (97.9, 96.7, 97.4 and 94.7% v.s. 93.9, 94.5, 94.3 and 91.8%, respectively), and the difference was  
25 statistically significant in all years except for 2015 (P= 0.034, 0.090, 0.002, and 0.003, respectively).  
26  
27  
28  
29  
30  
31  
32  
33  
34  
35

36  
37 The passing rate of quota with scholarship was the highest among all the groups except for 2017 in  
38 which the percentage of scholarship alone was the highest.  
39  
40  
41

42  
43 The passing rate of quota with scholarship was still higher than that of the comparison group  
44 except for 2017 even when the comparison group was limited to the graduates of public (i.e.,  
45 national or prefectural) medical schools (93.6%, 94.8%, 95.3%, and 95.1% respectively). The  
46  
47  
48  
49  
50  
51 difference was however significant only in 2016 (p=0.16, 0.31, 0.02, and 0.31 respectively) (data not  
52  
53  
54 shown in the figure).  
55  
56  
57  
58  
59  
60



1  
2  
3  
4  
5  
6  
7  
8  
9  
10  
11  
12  
13  
14  
15  
16  
17  
18  
19  
20  
21  
22  
23  
24  
25  
26  
27  
28  
29  
30  
31  
32  
33  
34  
35  
36  
37  
38  
39  
40  
41  
42  
43  
44  
45  
46  
47  
48  
49  
50  
51  
52  
53  
54  
55  
56  
57  
58  
59  
60

Figure 2A-D here

#### **Retention rates for contractual work (non-buying-out rates)**

Figure 3A-C shows the retention rates of subjects in quota with scholarship and those in non-quota with scholarship. Figure 3D shows the rates of all the graduates between 2014 and 2017. The retention rate varied by graduation year and at intervals after graduation. In all graduation years, the retention rate of quota with scholarship was higher than that of scholarship alone at the end of follow-up, but the difference was not statistically significant (Figure 3A-C). The survival analysis including all the subjects who obtained physician license between 2014 and 2017 showed that the retention rate 3.25 years after graduation was 92.2% for those in quota with scholarship and 89.9% for those with scholarship alone (statistically not significant: Figure 3D).

The 2014-2017 retention rate of quota with scholarship varied substantially among prefectures (78.4%-100%). The rate of scholarship alone likewise varied among prefectures (70.8%-100%) (data not shown in the figure).

Figure 3A-D here

## DISCUSSION

The results of this study showed that the graduates of regional quota with scholarship were more likely to pass the National License Examination for Physicians than the other new graduates of medical schools. The percentage of those who remained in the contractual workforce accompanied with scholarship 3.25 years after graduation was 92.2% among those of quota with scholarship, and 89.9% among those with scholarship alone.

There has been a concern about the academic level of quota entrants because they are admitted to medical school under different criteria.<sup>15</sup> The results of this study, however, show that the concern is invalid at least for the observed period. In Japan the length of undergraduate medical education is six years, which is long enough to obscure the correlation between academic performance at entrance and that at graduation.<sup>22</sup> Also in the usual admission process, many applicants are examined over the course of a few days, which forces medical schools to choose entrants solely based on their test scores. Elements other than the written test score, such as the personal statement and interview result, are not as valued. In contrast, the admission process in many of the regional quotas is a combined evaluation of the applicant's high school activities, a recommendation letter from the high school, an interview, an academic test, and a personal statement. The variety of elements valued in the process may have contributed to a better academic performance of quota students, and subsequently the better outcome on the

1  
2  
3  
4  
5  
6 physician license examination. The results of this study thus offer a warning to Japan's  
7  
8  
9 conventional medical school admission process. The government of Japan is scheduled to revise,  
10  
11 on a nationwide basis, the process of university entrance in 2021. This revision should make the  
12  
13  
14 selection of medical school applicants more effective.  
15

16  
17 There is a room for argument whether the contract retention rates shown in this study are  
18  
19 high or low. The results shown are the overall value of all the subjects in all prefectures of Japan.  
20  
21 In reality, however, there is a substantial difference among prefectures. It is thus necessary to  
22  
23 evaluate the result in each prefecture or in each medical school. The retention rate of graduates  
24  
25 from Jichi Medical University, founded in 1972 solely to produce rural physicians and became  
26  
27 the model when making regional quota programmes all over the country, is 97%.<sup>23</sup> The  
28  
29 percentage is obviously higher than that of quota graduates shown in this study. However the  
30  
31 total amount of prefecture scholarship given to a Jichi student for six years is 23 million yen  
32  
33 (equivalent to USD 209,090), which is double the average amount of scholarship for a quota  
34  
35 student: 12.2 million yen (USD 110,909).<sup>13,24</sup> In order to make the quota programme sustainable,  
36  
37 we need to consider the balance between the financial burden of the country/prefecture and the  
38  
39 certainty to secure physicians in needed areas. Also the differences in the training offered to  
40  
41 students, in the focus of the school, and in postgraduate training programmes may have  
42  
43 contributed to the gap in retention rates between Jichi and quotas.  
44  
45  
46  
47  
48  
49  
50  
51  
52  
53  
54  
55  
56  
57  
58  
59  
60

1  
2  
3  
4  
5  
6 Internationally there are many financial incentive programmes to recruit physicians to  
7  
8 practice in rural areas.<sup>25,26</sup> The estimated retention rate of the pooled subjects of these  
9  
10 programmes was reported to be 71%.<sup>26</sup> The retention rate of subjects in state scholarship  
11  
12 programmes for medical students in the United States was 66.5%.<sup>27</sup> While international data are  
13  
14 favourable, it is not known if the relationships would hold for Japan. Thus further study is  
15  
16 needed in Japan.  
17  
18  
19  
20  
21

22  
23 This study has the following limitations. First, as this study gathered information about  
24  
25 graduates, their academic performance and scholarship buy-out rate before graduation are  
26  
27 unknown. According to the Association of Japan Medical Colleges, the straight graduation rate,  
28  
29 which is the proportion of students who have finished their six-year medical program without  
30  
31 repeating a school year, of quota students who entered in 2008 was 89.6% nationwide, which was  
32  
33 higher than the rate of all the medical school entrants in the year (85.4%). The rate of quota entrants  
34  
35 in 2009, which was 89.0%, was also higher than that of all medical students (84.2%).<sup>13</sup> The report  
36  
37 also mentioned that 0.7% of undergraduate quota students bought out their prefectural  
38  
39 scholarship each year.<sup>13</sup> This information should be added to the results of this study when  
40  
41 assessing the effectiveness of quota and scholarship programmes. The geographic location of the  
42  
43 quota graduates and scholarship recipients are not shown in this study. Their location,  
44  
45 particularly after their contractual periods, is the most important outcome of these programs,  
46  
47  
48  
49  
50  
51  
52  
53  
54  
55  
56  
57  
58  
59  
60

1  
2  
3  
4  
5  
6 and will be assessed in the near future, based on the data from the ongoing cohort study.  
7

8  
9       Regional quotas and prefecture scholarships are based on temporary legislation by the  
10  
11 national government, and thus the programmes will be revised starting in 2018. In most of the  
12  
13 prefectures, however, the first generation of the quota entrants is still undergoing its clinical  
14  
15 training or have just started their practice in rural areas. So, as of this writing (summer 2017),  
16  
17 we cannot assess the final outcomes of these programmes. All we can do is to collect  
18  
19 intermediate outcomes like those shown in this study, analyse them in a variety of dimensions,  
20  
21 and engage in evidence-based decision making for the future national policies while  
22  
23 accumulating data for the next assessment.  
24  
25  
26  
27  
28  
29  
30  
31  
32  
33

## 34 **CONCLUSION**

35  
36  
37       The passing rate of the entrants to the *chiikiwaku*, regional quota of entrants to medical schools,  
38  
39 for the National License Examination for Physicians was higher than the rate of non-quota medical  
40  
41 graduates. The passing rate of prefecture scholarship recipients was also higher than non-recipients.  
42  
43  
44  
45 More than 90% of quota physicians with scholarship were complying with the terms of their contract  
46  
47 for more than three years after obtaining the physician license during which we observed. The  
48  
49 imminent revision of the national policy regarding the quota and scholarship programmes should be  
50  
51 based on these intermediate outcomes.  
52  
53  
54  
55  
56  
57  
58  
59  
60

## Contributors

MM contributed to the study design, tools, study administration, data collection, analysis, interpretation of data, and writing the draft. KT and TM contributed to the study design, tools, study administration, data interpretation, and writing the draft. ST and KI contributed to the study design, interpretation of data, and writing the draft. SK contributed to the analysis and writing the draft, TO and SI contributed to the study administration, data collection.

## Funding

This study is funded by the Ministry of Education, Culture, Sports, Science and Technology KAKENHI Grant-in-Aid for Scientific Research (C), Grant Number (25460803).

## Competing interests

None

## Ethics approval

Ethical approval was granted by the Ethics Committee for epidemiological research of Hiroshima University (ref. no. 778) and the Research Ethics Committee of Nagasaki University Graduate School of Biomedical Sciences (ref. no. 13091342).

## Data sharing statement

Conditions of the ethical approvals permit the cohort office (Department of Community-Based

1  
2  
3  
4  
5  
6 Medical System, Graduate School of Biomedical and Health Sciences, Hiroshima University) and  
7  
8 the sub-office (Department of Community Medicine, Nagasaki University Graduate School of  
9  
10  
11 Biomedical Science) to share the aggregated data with stakeholders or researchers.  
12  
13  
14  
15  
16

## 17 REFERENCES

- 18  
19  
20  
21  
22 1. Matsumoto M, Inoue K, Kajii E, Takeuchi K. Retention of physicians in rural Japan:  
23 concerted efforts of the government, prefectures, municipalities and medical schools. *Rural*  
24 *Remote Health*. 2010;10:1432.
- 25  
26 2. Matsumoto M, Takeuchi K, Yokobayashi K, Tazuma S. Geographic maldistribution of  
27 physicians in Japan : increasing the number of generalists is one solution. *J Gen Fam Med*  
28 2015;16:1-5.
- 29  
30 3. Inoue K, Matsumoto M, Toyokawa S, Kobayashi Y. Transition of physician distribution  
31 (1980-2002) in Japan and factors predicting future rural practice. *Rural Remote Health*.  
32 2009;9:1070.
- 33  
34 4. Toyabe S. Trend in geographic distribution of physicians in Japan. *Int J Equity Health*.  
35 2009;8:5.
- 36  
37 5. Tanihara S, Kobayashi Y, Une H, Kawachi I. Urbanization and physician maldistribution: a  
38 longitudinal study in Japan. *BMC Health Serv Res*. 2011;11:260.
- 39  
40 6. Kobayashi Y, Takaki H. Geographic distribution of physicians in Japan. *Lancet*.  
41 1992;340:1391-3.
- 42  
43 7. Matsumoto M, Inoue K, Bowman R, Noguchi S, Toyokawa S, Kajii E. Geographical  
44 distributions of physicians in Japan and US: Impact of healthcare system on physician  
45 dispersal pattern. *Health Policy* 2010;96:255-61.
- 46  
47 8. Hara K, Otsubo T, Kunisawa S, Imanaka Y. Examining sufficiency and equity in the  
48 geographic distribution of physicians in Japan: a longitudinal study. *BMJ Open*.  
49 2017;7:e013922.
- 50  
51 9. Iwata K, Mosby DJ, Sakane M. Board certification in Japan: corruption and near-collapse of  
52 reform. *Postgrad Med J*. 2017;93:436.
- 53  
54 10. Japan Association of City Mayors. Kokumin-fuzai no shinsenmoni-seido wo kigushi  
55  
56  
57  
58  
59  
60

- 1  
2  
3  
4  
5 sessoku ni susumeru kotoni hantaisuru kinkyu youbou (Objecting the new programs for  
6 producing specialist doctors.). 2017.  
7 [http://www.mayors.or.jp/p\\_opinion/documents/290412shinsenmoni\\_kinkyuyoubou](http://www.mayors.or.jp/p_opinion/documents/290412shinsenmoni_kinkyuyoubou.pdf)  
8 .pdf. (Accessed April 25, 2017).  
9
- 10  
11 **11.** Ministry of Health, Labour and Welfare. Shakai-hosyou-shingikai iryoubukai dai46kai  
12 gijiroku (Discussion record of the 46th meical group meeting of the Social Security  
13 Committee). 2016.  
14 [http://www.mhlw.go.jp/file/05-Shingikai-12601000-Seisakutoukatsukan-Sanjikanshitsu\\_Sha](http://www.mhlw.go.jp/file/05-Shingikai-12601000-Seisakutoukatsukan-Sanjikanshitsu_Shakaihouhou/gijiroku46.pdf)  
15 [kaihouhou/gijiroku46.pdf](http://www.mhlw.go.jp/file/05-Shingikai-12601000-Seisakutoukatsukan-Sanjikanshitsu_Shakaihouhou/gijiroku46.pdf). (Accessed April 25, 2017).  
16
- 17  
18 **12.** Ministry of Health Labour and Welfare. Shakai-hosyou-shingikai iryoubukai dai47kai  
19 gijiroku (Discussion record of the 47th meical group meeting of the Social Security  
20 Committee). 2016. <http://www.mhlw.go.jp/stf/shingi2/0000149697.html>. (Accessed April 25,  
21 2017)  
22
- 23  
24 **13.** Association of Japan Medical Colleges. *Heisei 28 nendo chiikiwaku-nyugaku-seido to*  
25 *chiiki-iryō-shien-senta no jitsujou ni kansuru chousahoukoku (Survey report on regional*  
26 *subquota admission and community health support centers in 2016.)* Tokyo: AJMC;2017.  
27
- 28  
29 **14.** Matsumoto M, Inoue K, Takeuchi K. Quality of care in Japan: an additional strategy. *Lancet*.  
30 2011;378:e17.  
31
- 32  
33 **15.** Matsumoto M, Takeuchi K, Tanaka J, et al. Follow-up study of the regional quota system of  
34 Japanese medical schools and prefecture scholarship programmes: a study protocol. *BMJ*  
35 *Open*. 2016;6:e011165.  
36
- 37  
38 **16.** Matsumoto M, Mizooka M, Tazuma S. General practice departments of university hospitals  
39 and certified training programs for general practitioners in Japan: a nationwide  
40 questionnaire survey. *J Gen Fam Med*. 2017; 00: 1-5.  
41
- 42  
43 **17.** Ministry of Education, Culture, Sports, Science and Technology. Heisei28nendo igakubu  
44 nyugakuteiinnzou ni tuite (Increase in the number of entrants to medical schools in 2016).  
45 2016.  
46 [http://www.mext.go.jp/b\\_menu/houdou/27/10/\\_\\_\\_icsFiles/afieldfile/2015/10/23](http://www.mext.go.jp/b_menu/houdou/27/10/___icsFiles/afieldfile/2015/10/23/1363060_4_1.pdf)  
47 [/1363060\\_4\\_1.pdf](http://www.mext.go.jp/b_menu/houdou/27/10/___icsFiles/afieldfile/2015/10/23/1363060_4_1.pdf). (Accessed June 22, 2016).  
48
- 49  
50 **18.** Sapix Yozemi Group. 2016-nendo kokukouritsudaigaku-nyushi joukyou to bunseki (Results  
51 and analysis of public medical school admission in 2016). 2016.  
52 <http://juken.y-sapix.com/articles/3640.html>. (Accessed August 19, 2017).  
53
- 54  
55 **19.** Sapix Yozemi Group. 2016-nendo shiritsudaigaku-nyushi joukyou to bunseki (Results and  
56 analysis of private medical school admission in 2016). 2016.  
57 <http://juken.y-sapix.com/articles/3668.html>. (Accessed August 19, 2017).  
58
- 59  
60 **20.** Ministry of Health, Labour and Welfare. Kokka-shiken-gokaku-happyou (Results of the



- national license examinations). 2017.  
[http://www.mhlw.go.jp/kouseiroudoushou/shikaku\\_shiken/goukaku.html](http://www.mhlw.go.jp/kouseiroudoushou/shikaku_shiken/goukaku.html).  
 (Accessed August 15, 2017)
21. TECOM Inc. Kokkashiken-jouhou dai 108-111 kai (Information on the 108th-111th national license examinations). 2017. <https://www2.tecomgroup.jp/igaku/topics/kokushi/>. (Accessed August 15, 2017).
  22. Sakemi T. Heisei 14-15nendo igakubu-igakuka-nyugakusya no nyugakugo-seiseki ni kansuru bunseki (Academic performance of medical students after admission). *Daigakukyoku Nempo*. 2010;6:1-13.
  23. Matsumoto M, Kajii E. Medical education program with obligatory rural service: analysis of factors associated with obligation compliance. *Health Policy* 2009;90(2-3):125-32.
  24. Jichi Medical University. Syugaku-shikin, shogakushikin (Scholarship system). 2017. <https://www.jichi.ac.jp/exam/medicine/campus/backup.html>. (Accessed August 15, 2017).
  25. Frehywot S, Mullan F, Payne PW, Ross H. Compulsory service programmes for recruiting health workers in remote and rural areas: do they work? *Bull World Health Org*. 2010;88:364-70.
  26. Barnighausen T, Bloom DE. Financial incentives for return of service in underserved areas: a systematic review. *BMC health serv res*. 2009;9:86.
  27. Pathman DE, Konrad TR, King TS, Taylor DH, Jr., Koch GG. Outcomes of states' scholarship, loan repayment, and related programs for physicians. *Med Care*. 2004;42:560-8.

**Table 1. Response rates of prefectures and medical schools**

Table 1. Response rates of prefectures and medical schools

| Year | Prefectures |               |                        |                   | Medical Schools |               |             |
|------|-------------|---------------|------------------------|-------------------|-----------------|---------------|-------------|
|      | N*          | Response rate | Subjects               |                   | N*              | Response rate | Subjects    |
|      |             |               | Quota with scholarship | Scholarship alone |                 |               | Quota alone |
| 2014 | 36/36       | 100%          | 144                    | 322               | 19/19           | 100%          | 166         |
| 2015 | 45/46       | 97.8%         | 305                    | 391               | 22/22           | 100%          | 253         |
| 2016 | 46/47       | 97.8%         | 498                    | 340               | 29/29           | 100%          | 308         |
| 2017 | 47/47       | 100%          | 609                    | 376               | 31/31           | 100%          | 382         |

\*Both the number of eligible prefectures (medical schools) and that of responded prefectures (medical

1  
2  
3  
4  
5 schools) are shown.  
6  
7  
8  
9

---

### 10 **Figure legends**

11  
12  
13  
14  
15  
16 Figure 1. Study subjects and data collection.

17  
18 Figure 1 footnote. “Quota with scholarship” are students who entered a regional quota and received a  
19  
20  
21 prefecture scholarship, “quota alone” are students who entered the quota but did not receive the  
22  
23  
24 scholarship, “scholarship alone” are students who received the scholarship but did not enter the  
25  
26  
27 quota, and others are all medical students excluding quota and scholarship ones.  
28  
29  
30  
31

32  
33 Figure 2. Passing rates of the National Licence Examination for Physicians (A: 2014, B: 2015, C:  
34  
35 2016, D: 2017).

36  
37  
38 Figure 2 footnote. Control data were from the Ministry of Health, Labour and Welfare.<sup>20,21</sup> Rates in  
39  
40  
41 2014 and 2015 have been reported previously.<sup>15</sup> \*Fisher’s exact test.  
42  
43  
44  
45  
46

47  
48 Figure 3. Retention rates of subjects in quota with scholarship and those in non-quota with  
49  
50 scholarship (scholarship alone). (A: graduates in 2014, B: 2015, C: 2016, D: 2014-2017)  
51  
52  
53  
54  
55  
56  
57  
58  
59  
60

1  
2  
3  
4  
5  
6  
7  
8  
9  
10  
11  
12  
13  
14  
15  
16  
17  
18  
19  
20  
21  
22  
23  
24  
25  
26  
27  
28  
29  
30  
31  
32  
33  
34  
35  
36  
37  
38  
39  
40  
41  
42  
43  
44  
45  
46  
47  
48  
49  
50  
51  
52  
53  
54  
55  
56  
57  
58  
59  
60



Figure 1

80x37mm (300 x 300 DPI)

er review only

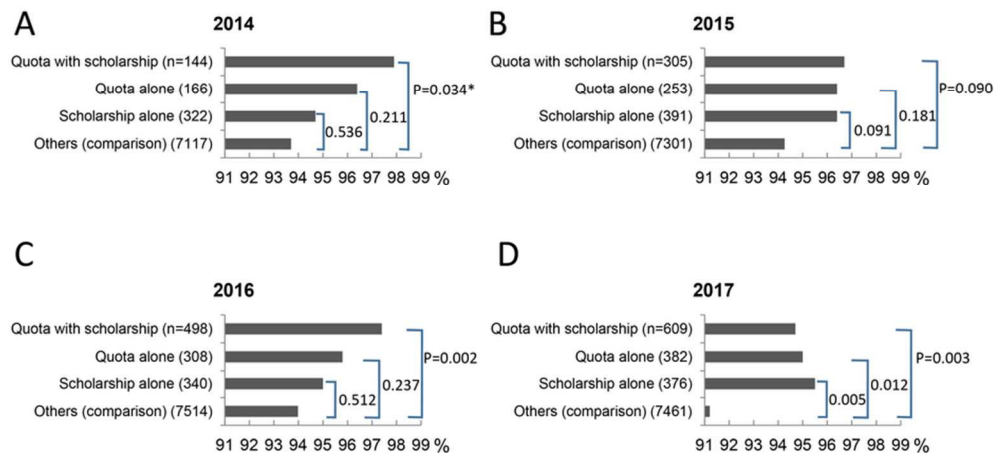

Figure 2

80x37mm (300 x 300 DPI)

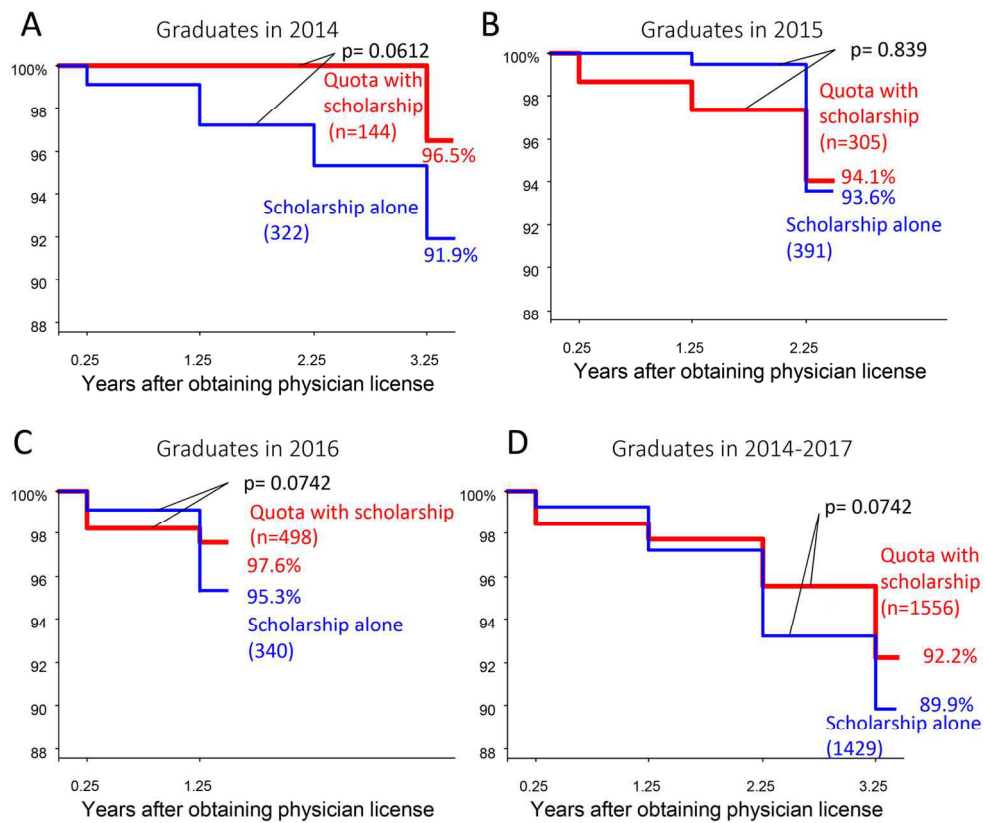

Figure 3

140x116mm (300 x 300 DPI)

**STROBE 2007 (v4) Statement—Checklist of items that should be included in reports of *cross-sectional studies***

| Section/Topic                | Item # | Recommendation                                                                                                                                                                       | Reported on page #                             |
|------------------------------|--------|--------------------------------------------------------------------------------------------------------------------------------------------------------------------------------------|------------------------------------------------|
| Title and abstract           | 1      | (a) Indicate the study's design with a commonly used term in the title or the abstract                                                                                               | 2                                              |
|                              |        | (b) Provide in the abstract an informative and balanced summary of what was done and what was found                                                                                  | 2-3                                            |
| <b>Introduction</b>          |        |                                                                                                                                                                                      |                                                |
| Background/rationale         | 2      | Explain the scientific background and rationale for the investigation being reported                                                                                                 | 5-8                                            |
| Objectives                   | 3      | State specific objectives, including any prespecified hypotheses                                                                                                                     | 8                                              |
| <b>Methods</b>               |        |                                                                                                                                                                                      |                                                |
| Study design                 | 4      | Present key elements of study design early in the paper                                                                                                                              | 8-9                                            |
| Setting                      | 5      | Describe the setting, locations, and relevant dates, including periods of recruitment, exposure, follow-up, and data collection                                                      | 8-9                                            |
| Participants                 | 6      | (a) Give the eligibility criteria, and the sources and methods of selection of participants                                                                                          | 9-10                                           |
| Variables                    | 7      | Clearly define all outcomes, exposures, predictors, potential confounders, and effect modifiers. Give diagnostic criteria, if applicable                                             | 9-10                                           |
| Data sources/<br>measurement | 8*     | For each variable of interest, give sources of data and details of methods of assessment (measurement). Describe comparability of assessment methods if there is more than one group | 9-11                                           |
| Bias                         | 9      | Describe any efforts to address potential sources of bias                                                                                                                            | 8-9                                            |
| Study size                   | 10     | Explain how the study size was arrived at                                                                                                                                            | Not needed. This study is a nationwide census. |
| Quantitative variables       | 11     | Explain how quantitative variables were handled in the analyses. If applicable, describe which groupings were chosen and why                                                         | 10-11                                          |
| Statistical methods          | 12     | (a) Describe all statistical methods, including those used to control for confounding                                                                                                | 10-11                                          |
|                              |        | (b) Describe any methods used to examine subgroups and interactions                                                                                                                  | Not applicable                                 |
|                              |        | (c) Explain how missing data were addressed                                                                                                                                          | 11                                             |
|                              |        | (d) If applicable, describe analytical methods taking account of sampling strategy                                                                                                   | 11                                             |

|                          |     |                                                                                                                                                                                                              |                                  |
|--------------------------|-----|--------------------------------------------------------------------------------------------------------------------------------------------------------------------------------------------------------------|----------------------------------|
|                          |     | (e) Describe any sensitivity analyses                                                                                                                                                                        | Not needed.                      |
| <b>Results</b>           |     |                                                                                                                                                                                                              |                                  |
| Participants             | 13* | (a) Report numbers of individuals at each stage of study—eg numbers potentially eligible, examined for eligibility, confirmed eligible, included in the study, completing follow-up, and analysed            | 11                               |
|                          |     | (b) Give reasons for non-participation at each stage                                                                                                                                                         | 11                               |
|                          |     | (c) Consider use of a flow diagram                                                                                                                                                                           | 9                                |
| Descriptive data         | 14* | (a) Give characteristics of study participants (eg demographic, clinical, social) and information on exposures and potential confounders                                                                     | No data                          |
|                          |     | (b) Indicate number of participants with missing data for each variable of interest                                                                                                                          | 11 (no data on missing subjects) |
| Outcome data             | 15* | Report numbers of outcome events or summary measures                                                                                                                                                         | 11-13                            |
| Main results             | 16  | (a) Give unadjusted estimates and, if applicable, confounder-adjusted estimates and their precision (eg, 95% confidence interval). Make clear which confounders were adjusted for and why they were included | 11-13                            |
|                          |     | (b) Report category boundaries when continuous variables were categorized                                                                                                                                    | 11-13                            |
|                          |     | (c) If relevant, consider translating estimates of relative risk into absolute risk for a meaningful time period                                                                                             | Not relevant                     |
| Other analyses           | 17  | Report other analyses done—eg analyses of subgroups and interactions, and sensitivity analyses                                                                                                               | Not applicable                   |
| <b>Discussion</b>        |     |                                                                                                                                                                                                              |                                  |
| Key results              | 18  | Summarise key results with reference to study objectives                                                                                                                                                     | 13                               |
| Limitations              | 19  | Discuss limitations of the study, taking into account sources of potential bias or imprecision. Discuss both direction and magnitude of any potential bias                                                   | 15-16                            |
| Interpretation           | 20  | Give a cautious overall interpretation of results considering objectives, limitations, multiplicity of analyses, results from similar studies, and other relevant evidence                                   | 13-16                            |
| Generalisability         | 21  | Discuss the generalisability (external validity) of the study results                                                                                                                                        | 15                               |
| <b>Other information</b> |     |                                                                                                                                                                                                              |                                  |
| Funding                  | 22  | Give the source of funding and the role of the funders for the present study and, if applicable, for the original study on which the present article is based                                                | 17                               |

\*Give information separately for cases and controls in case-control studies and, if applicable, for exposed and unexposed groups in cohort and cross-sectional studies.

1  
2  
3  
4 **Note:** An Explanation and Elaboration article discusses each checklist item and gives methodological background and published examples of transparent reporting. The STROBE  
5 checklist is best used in conjunction with this article (freely available on the Web sites of PLoS Medicine at <http://www.plosmedicine.org/>, Annals of Internal Medicine at  
6 <http://www.annals.org/>, and Epidemiology at <http://www.epidem.com/>). Information on the STROBE Initiative is available at [www.strobe-statement.org](http://www.strobe-statement.org).  
7  
8  
9  
10  
11  
12  
13  
14  
15  
16  
17  
18  
19  
20  
21  
22  
23  
24  
25  
26  
27  
28  
29  
30  
31  
32  
33  
34  
35  
36  
37  
38  
39  
40  
41  
42  
43  
44  
45  
46  
47

For peer review only
